1 **Spatial tuning shifts increase the discriminability and fidelity of population codes in visual**  
2 **cortex**

3  
4 Running title: Spatial attention from units to populations

5  
6 Vy A. Vo<sup>1\*</sup>, Thomas C. Sprague<sup>1,2</sup>, John T. Serences<sup>1,3,4\*</sup>

7 <sup>1</sup>Neurosciences Graduate Program, University of California, San Diego, La Jolla, CA 92093

8 <sup>2</sup>Department of Psychology and Center for Neural Science, New York University, New York,  
9 New York 10003

10 <sup>3</sup>Department of Psychology, University of California, San Diego, La Jolla, CA 92093

11 <sup>4</sup>Kavli Institute for Brain and Mind, University of California, San Diego, La Jolla, CA 92093

12

13 **\*Correspondence:**

14 Neurosciences Graduate Program

15 University of California, San Diego

16 La Jolla, CA 92093-0634

17 [vyaivo@ucsd.edu](mailto:vyaivo@ucsd.edu) or [jserences@ucsd.edu](mailto:jserences@ucsd.edu)

18

19

20 **Acknowledgements**

21 Many thanks to the lab and particularly to Rosanne Rademaker and Edward Vul for comments  
22 on analyses and on the manuscript. This work was supported by National Science Foundation  
23 Graduate Research Fellowships to V.A.V. and T.C.S., and a grant from the National Eye  
24 Institute (R01-EY025872) and a Scholar Award from the James S. McDonnell Foundation to  
25 J.T.S.

26 **ABSTRACT**

27 Selective visual attention enables organisms to enhance the representation of behaviorally  
28 relevant stimuli by altering the encoding properties of single receptive fields (RFs). Yet we know  
29 little about how the attentional modulations of single RFs contribute to the encoding of an entire  
30 visual scene. Addressing this issue requires (1) measuring a group of RFs that tile a continuous  
31 portion of visual space, (2) constructing a population-level measurement of spatial  
32 representations based on these RFs, and (3) linking how different types of RF attentional  
33 modulations change the population-level representation. To accomplish these aims, we used  
34 fMRI to characterize the responses of thousands of voxels in retinotopically organized human  
35 cortex. First, we found that the response modulations of voxel RFs (vRFs) depend on the spatial  
36 relationship between the RF center and the visual location of the attended target. Second, we  
37 used two analyses to assess the spatial encoding quality of a population of voxels. We found that  
38 attention increased fine spatial discriminability and representational fidelity near the attended  
39 target. Third, we linked these findings by manipulating the observed vRF attentional modulations  
40 and recomputing our measures of the fidelity of population codes. Surprisingly, we discovered  
41 that attentional enhancements of population-level representations largely depend on position  
42 shifts of vRFs, rather than changes in size or gain. Our data suggest that position shifts of single  
43 RFs are a principal mechanism by which attention enhances population-level representations in  
44 visual cortex.

45

46 **SIGNIFICANCE STATEMENT**

47 While changes in the gain and size of RFs have dominated our view of how attention modulates  
48 information codes of visual space, such hypotheses have largely relied on the extrapolation of

49 single-cell responses to population responses. Here we use fMRI to relate changes in single  
50 voxel receptive fields (vRFs) to changes in the precision of representations based on larger  
51 populations of voxels. We find that vRF position shifts contribute more to population-level  
52 enhancements of visual information than changes in vRF size or gain. This finding suggests that  
53 position shifts are a principal mechanism by which spatial attention enhances population codes  
54 for relevant visual information in sensory cortex. This poses challenges for labeled line theories  
55 of information processing, suggesting that downstream regions likely rely on distributed inputs  
56 rather than single neuron-to-neuron mappings.

57

## 58 **INTRODUCTION**

59         Spatial receptive fields (RFs) are a core component of visual information processing  
60 throughout the visual system. They are modified by selective visual attention to improve the  
61 fidelity of sensory representations, likely enabling more precise, accurate perception (Desimone  
62 and Duncan, 1995; Anton-Erxleben and Carrasco, 2013). Prior studies in non-human primates  
63 have found that covert spatial attention changes the position, size, and amplitude of responses in  
64 single-cell RFs in early cortical areas such as V1, V4, and MT (Moran and Desimone, 1985;  
65 Connor et al., 1996, 1997, Womelsdorf et al., 2006, 2008; Roberts et al., 2007; David et al.,  
66 2008). Recent neuroimaging studies have also shown that single-voxel RFs (vRFs) undergo  
67 similar response changes with attention, shifting towards the attended target or changing in size  
68 (de Haas et al., 2014; Klein et al., 2014; Kay et al., 2015; Sheremata and Silver, 2015). Most  
69 accounts suggest that these RF modulations improve the spatial representations of the attended  
70 target, either by boosting the signal-to-noise ratio (SNR) by increasing response amplitude, or by  
71 increasing the spatial resolution by decreasing RF size (Desimone and Duncan, 1995; Anton-

72 Erxleben and Carrasco, 2013; Cohen and Maunsell, 2014). These mechanisms are akin to turning  
73 up the volume (gain increase) or to using smaller pixels to encode a digital image (size decrease).

74 Despite these documented modulations, it is not yet clear how different types of RF  
75 modulations are combined to facilitate robust population codes. Recent studies have only begun  
76 to explore how interactions between neurons may affect the coding properties of the population  
77 (Anton-Erxleben and Carrasco, 2013; Cohen and Maunsell, 2014). Yet analyzing these data at a  
78 population level is crucial for understanding how spatial attention changes the overall  
79 representation of an attended area. Prior fMRI studies that measured many vRFs across space  
80 were often unable to report the full pattern of response modulations with respect to the attended  
81 target because subjects attended to the mapping stimulus, rather than to a fixed point in space  
82 (Sprague and Serences, 2013; Kay et al., 2015; Sheremata and Silver, 2015). Studies which fixed  
83 the locus of attention have reported mixed results on vRF modulations (de Haas et al., 2014;  
84 Klein et al., 2014). The first aim of this study was thus to evaluate how properties of vRFs in  
85 retinotopic areas change with attention, especially near the peripheral attention target.

86 The second aim of the study was to evaluate how different types of RF modulations  
87 contribute to population-level enhancements of an attended region of space. Single RFs in early  
88 visual areas are fundamentally local encoding models that are relatively uninformative about  
89 regions outside their immediate borders. To study their relationship to a population-level  
90 representation of space, other metrics are needed to integrate information across all local  
91 encoding units – e.g., vRFs – to evaluate how attentional modulations impact the quality of  
92 population codes. Here, we used two different population-level metrics of spatial encoding  
93 fidelity to investigate these questions, and to determine how changes in vRF amplitude, size, or  
94 position affect the population-level representations. First, we used a measure related to Fisher

95 Information to evaluate the spatial discriminability of population codes. Second, we used a  
96 spatial encoding model that incorporates information across voxels to form representations of  
97 stimuli in the mapped visual field (Brouwer and Heeger, 2009; Sprague and Serences, 2013;  
98 Sprague et al., 2015).

99 We found that vRF position shifts increase both the spatial discriminability around the  
100 attended region as well as the fidelity of stimulus reconstructions near the attended target.  
101 Surprisingly, shifts in vRF position accounted for more of the population-level enhancements  
102 with attention than changes in vRF size or gain. This finding is unexpected in the context of  
103 ‘labeled-line’ models of information processing, which posit that visual representations rely on  
104 RFs that transmit consistent ‘labels’ for visual features such as spatial position. Our findings  
105 suggest that apparent shifts in the labels of RFs play an important role in the attentional  
106 enhancement of visual information.

107

## 108 **MATERIALS & METHODS**

### 109 **Task design and participants**

110 We collected data from 9 human participants (4 female), 6 of whom had previously completed a  
111 set of retinotopic mapping scans in the lab (participants AA, AB, AC, AI, and AL in Sprague &  
112 Serences, 2013; participants AA, AC, and AI in Sprague et al., 2014; all participants in Ester et  
113 al., 2015). All participants provided written informed consent and were compensated for their  
114 time (\$20/hour) as approved by the local UC San Diego Institutional Review Board. Participants  
115 practiced both the attention task and the localizer task before entering the scanner. A minimum  
116 of four hours of scanning was required to complete the entire analysis, so one participant was  
117 excluded due to insufficient data (they only completed 2 hours). Another participant was

118 excluded for inconsistent behavioral performance, with average task accuracy at chance (48.6%).  
119 This yielded a total of 7 participants who completed the entire experiment (3 2-hour scan  
120 sessions per participant).

121 Participants centrally fixated a gray rectangular screen (120x90 cm) viewed via a head-  
122 coil mounted mirror (~3.85 m viewing distance). They attended one of three fixed locations on  
123 the screen: the fixation point or a target to the lower left or lower right of fixation. During each  
124 2000 ms trial, subjects reported a change in the attention target. When subjects attended fixation,  
125 they reported whether a brief contrast change (100 – 400 ms, starting 300 – 1000 ms into the  
126 trial) was dimmer or brighter than the baseline contrast. The peripheral attention targets were two  
127 pentagons (0.17° radius; 50% contrast) centered 2.1° to the left and right of fixation (**Fig 1a**).  
128 When subjects attended a peripheral target, they reported whether it rotated clockwise or  
129 counter-clockwise (rotation duration 100 - 300 ms, starting 300 - 1600 ms into the trial). Inter  
130 trial intervals (ITIs) randomly varied between 1000 to 3000 ms in 500 ms increments (mean ITI:  
131 2000 ms). The magnitude of the contrast change or the rotation was adjusted on each run to keep  
132 task performance for each participant near 75% (mean = 75.90%, bootstrapped 95% C.I.  
133 [72.46%, 79.20%]), with no significant difference between conditions as evaluated with a one-  
134 way repeated measures ANOVA randomization test ( $F(1,11) = 0.220$ , randomized  $p = 0.800$ ).  
135 For four participants, we collected 6 runs on the attend periphery tasks without a change in the  
136 luminance of the fixation stimulus. Performance on the attend periphery tasks was stable across  
137 runs with and without the luminance change (repeated-measures ANOVA with run type x  
138 random participants factor;  $p = 0.439$ , null F distribution using randomized labels for 10,000  
139 iterations). Therefore, these data were collapsed across scan sessions with and without changes  
140 in fixation luminance.

141

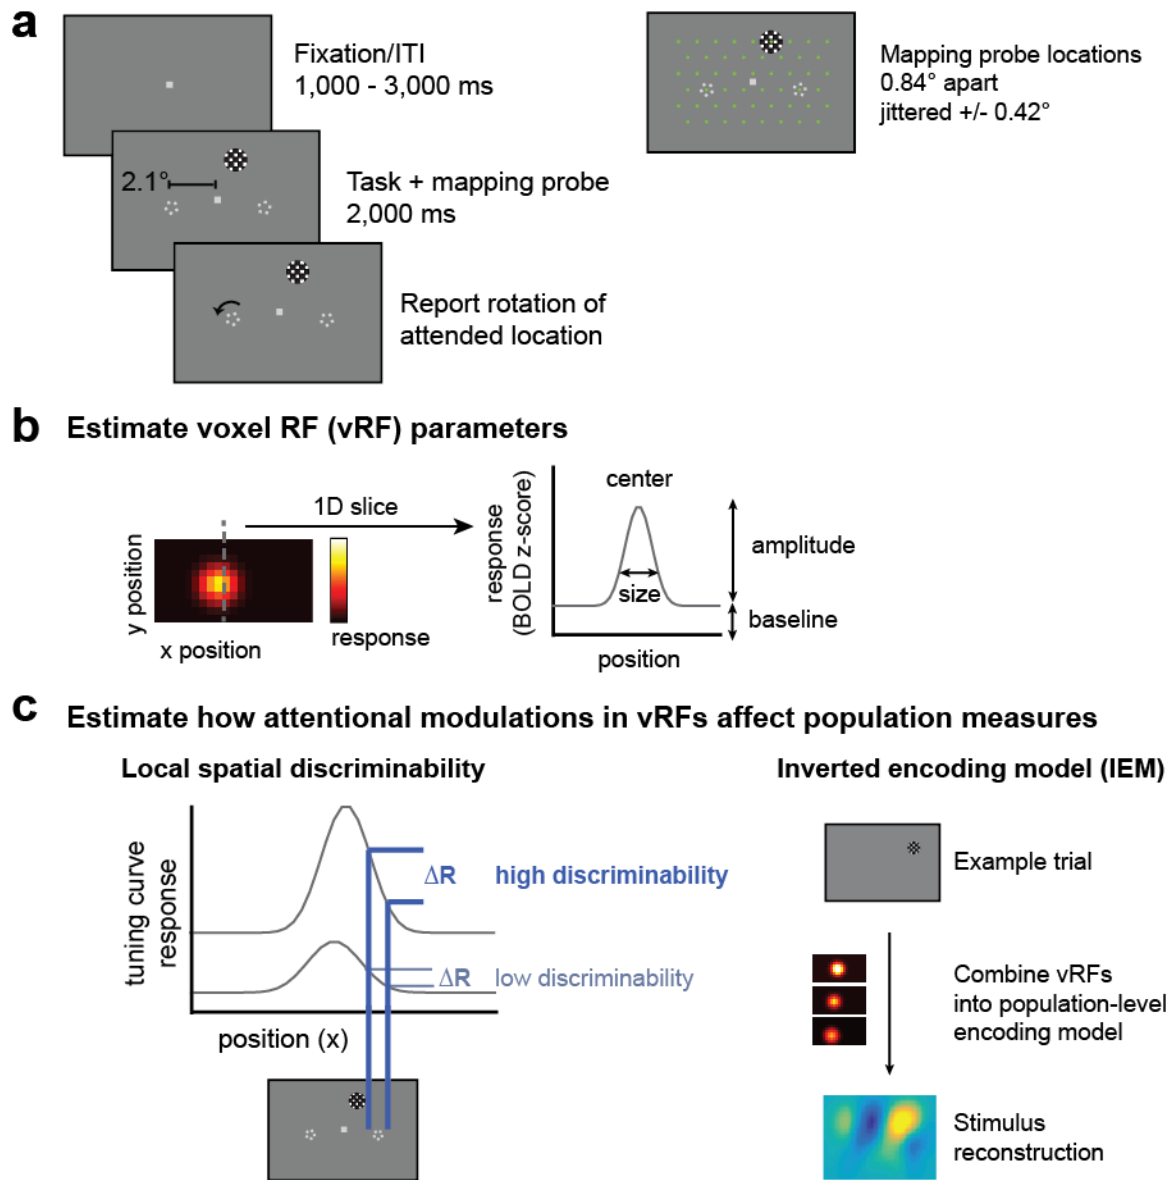

142

143 **Figure 1.** Covert spatial attention task and hypothesized representation changes with shifts of  
144 spatial attention. (a) Subjects fixated centrally and attended to brief rotations in the pentagon  
145 stimulus on the left or right while a flickering checkerboard probe stimulus appeared at one of 51  
146 grid locations across the visual field. On control runs, subjects attended to a contrast change at  
147 fixation. fMRI data measured during this attention task is used to create visualizable estimates of  
148 voxel receptive fields (vRFs) and stimulus reconstructions. (b) A receptive field model is fit to  
149 the responses of each voxel, and can be described by its x and y position (center), its response  
150 baseline, response amplitude, and its size (full-width half maximum). (c) Given a population of  
151 voxels in a retinotopic region, such as V1, we examine two different measures of spatial  
152 information in the population. The first, a spatial discriminability metric, scales with the slope of  
153 the tuning curve at a given location in space (**Materials and Methods**). The second relies on a

154 multivariate inverted encoding model (IEM) for space. By reconstructing images of the mapping  
155 stimulus on each test trial, we can measure how population-level spatial information changes  
156 with attention. We then can model how changes in individual vRFs affect both of these  
157 population measures.  
158

159         On 51 of the 61 trials in each run, a full-contrast 6 Hz flickering checkerboard ( $0.68^\circ$   
160 radius; 1.67 cycles/deg) appeared for 2000 ms at one of 51 different locations across the screen  
161 to map the spatial sensitivity of visually responsive voxels. These mapping stimuli covered a  
162 region of the screen roughly subtending  $9^\circ$  horizontal and  $6^\circ$  vertical when their position was  
163 jittered. When one of these checkerboards overlapped with any of the static attention targets,  
164 they were partially masked with a small circular aperture the same color as the screen  
165 background ( $0.16^\circ/0.25^\circ$  radius aperture for fixation/pentagon, respectively) that allowed the  
166 stimulus to remain visible. Participants were instructed to ignore the task-irrelevant flickering  
167 checkerboards throughout the experiment. During the 10 null trials on each scan, the participant  
168 continued to perform the attention task but no checkerboard was presented. Null trials and  
169 mapping stimulus trials were presented in a pseudorandom interleaved order.

170         The location of the checkerboard mapping stimulus on each trial was determined by  
171 generating an evenly spaced triangular grid ( $0.84^\circ$  between grid points) and centering the  
172 checkerboard on one of these grid points. The location of the checkerboard mapping stimulus  
173 was then jittered a random amount from these grid points ( $\pm 0.42^\circ/0.37^\circ$  horizontal/vertical).  
174 When subjects attended the peripheral target, half of the runs were presented at the discrete grid  
175 positions so that we could achieve more stable stimulus reconstructions (see **Population analysis**  
176 **(2)**).

177 **Magnetic resonance imaging**



178 We obtained all structural and functional MR images using a GE 3T MR750 scanner at  
179 University of California, San Diego. We collected all functional images (19.2 cm x 19.2 cm  
180 FOV, 64 x 64 acquisition matrix, 35 interleaved slices, 3 mm<sup>3</sup> voxels with 0 mm slice gap, 128  
181 volumes per scan run) using a gradient echo planar pulse sequence (2000 ms TR, 30 ms TE, 90°  
182 flip angle) and a 32-channel head coil (Nova Medical, Wilmington, MA). Five dummy scans  
183 preceded each functional run. A high-resolution structural image was acquired at the end of each  
184 session using a FSPGR T1-weighted pulse sequence (25.6 cm x 25.6 cm FOV, 256 x 192  
185 acquisition matrix, 8.136/3.172 ms TR/TE, 192 slices, 9° flip angle, 1 mm<sup>3</sup> voxels). All  
186 functional scans were co-registered to the anatomical images acquired during the same session,  
187 and this anatomical was in turn co-registered to the anatomical acquired during the retinotopy  
188 scan.

189 EPI images were unwarped with a custom script from UCSD's Center for Functional  
190 Magnetic Resonance Imaging using FSL and AFNI. All subsequent preprocessing was  
191 performed in BrainVoyager 2.6.1, including slice-time correction, six-parameter affine motion  
192 correction, and temporal high-pass filtering to remove slow signal drifts over the course of each  
193 run. Data were then transformed into Talairach space and resampled to have a 3x3x3 mm voxel  
194 size. Finally, the BOLD signal in each voxel was transformed into Z-scores on a scan-by-scan  
195 basis. All subsequent analyses were performed in MATLAB using custom scripts (available  
196 online on Open Science Framework: [osf.io/s9vqv](https://osf.io/s9vqv)).

197

### 198 **Independent localizer task**

199 We constrained our analyses to visually responsive voxels in occipital and parietal cortex  
200 using a separate localizer task (3-5 runs per participant). On 14 trials, participants fixated

201 centrally and viewed a full-field flickering checkerboard (10 Hz, 11.0/8.3° width/height) for  
202 8000 ms. Participants detected whether a small area (2D Gaussian,  $\sigma = 0.2^\circ$ ) within the  
203 checkerboard dimmed in contrast. Contrast dimming occurred between 500 to 4000 ms after the  
204 start of the trial, and lasted between 2000 to 3000 ms (all uniformly sampled in 500 ms steps).  
205 This contrast change occurred infrequently (randomly on 5 out of 14 trials) at a random location  
206 within the checkerboard. The average contrast change was varied between runs to maintain  
207 consistent performance at ~75% accuracy (mean performance 78.0%). On 8 trials participants  
208 simply fixated throughout the trial without a checkerboard being presented. We then used a  
209 standard general linear model (GLM) with a canonical two-gamma hemodynamic response  
210 function (HRF, peak at 5 s, undershoot peak at 15 s, response undershoot ratio 6, response  
211 dispersion 1, undershoot dispersion 1) to estimate the response to the checkerboard stimulus in  
212 each voxel. For all subsequent analyses, only voxels in the retinotopically defined areas V1, V2,  
213 V3, V4, V3A/B and IPS0 with a significantly positive BOLD response to the localizer task (at  
214 FDR  $q = 0.05$ ) were included (Benjamini and Yekutieli, 2001).

215

### 216 **Estimating single trial BOLD responses**

217 For all subsequent analyses, we used trial-wise BOLD  $z$ -scores. We estimated these by  
218 creating a boxcar model marking the duration of each checkerboard mapping stimulus and  
219 convolving it with a canonical two-gamma HRF (peak at 5 s, undershoot peak at 15 s, response  
220 undershoot ratio 6, response dispersion 1, undershoot dispersion 1). To standardize our data  
221 across runs, we  $z$ -scored the BOLD responses within each run and concatenated the  $z$ -scores  
222 across runs. We then solved a GLM to find the response to each predictor.

223

224 **Statistical procedures**

225 All reported confidence intervals (CIs) are computed by resampling the data with replacement  
226 (i.e. bootstrapping). The number of iterations for each bootstrapping procedure varied  
227 (depending on available computing power and time for that procedure) and are therefore reported  
228 with each result. For tests comparing a bootstrapped distribution against zero, p-values were  
229 computed by conducting two one-tailed tests against 0 (e.g.,  $\text{mean}(\text{param\_change} < 0)$  &  
230  $\text{mean}(\text{param\_change} > 0)$ ) and doubling the smaller p-value. All repeated tests were FDR  
231 corrected ( $q = 0.05$ ).

232

233 **Voxel receptive field (vRF) estimation, fitting, and parameter analysis**

234 We first estimated vRFs for each attention condition to investigate (1) how vRF  
235 parameters changed when participants attended to different locations and (2) the spatial pattern  
236 of vRF changes across visual space. We note here that prior reports have referred to similar  
237 voxel RF models as population receptive fields, or pRFs, to emphasize the fact that each voxel  
238 contains a population of spatially tuned neurons (Dumoulin and Wandell, 2008; Wandell and  
239 Winawer, 2015). However, since we are comparing modulations at different scales in the present  
240 study (i.e. modulations in single voxels and in patterns of responses across many voxels), we will  
241 refer to these single voxel measurements as voxel receptive fields (vRFs), and will reserve the  
242 term ‘population’ exclusively for multivariate measures involving several voxels, allowing our  
243 terminology to align with theories of population coding (Ma et al., 2006).

244 We estimated voxel receptive fields (vRFs) using a modified version of a previously  
245 described technique (Sprague and Serences, 2013). This method estimates a single voxel’s  
246 spatial sensitivity by modeling its BOLD responses as a linear combination of discrete, smooth

247 spatial filters tiled evenly across the mapped portion of the visual field. These spatial filters (or  
248 spatial channels) form our modeled basis set. We then regressed the BOLD z-scores ( $v$  voxels  $\times$   
249  $n$  trials) onto a design matrix with predicted channel responses for each trial ( $C$ ,  $k$  channels  $\times$   $n$   
250 trials) by solving Equation 1:

$$251 \quad (1) \quad B = WC$$

252 for the matrix  $W$  ( $v$  voxels  $\times$   $k$  channels).

253 Each of the  $k$  channels in the basis set was defined as a two-dimensional cosine that was  
254 fixed to reach 0 at a set distance from the filter center:

$$255 \quad (2) \quad f(r) = \left( 0.5 \left( \cos\left(\frac{r\pi}{s}\right) + 0.5 \right) \right)^7 \text{ for } r < s,$$

256 where  $r$  is the distance from the filter center and  $s$  is the size constant. Setting a zero baseline in  
257 this function ensured that we could estimate a stable baseline for each voxel by restricting the  
258 response of the channel to a known subregion of the visual display. Since the estimated vRF size  
259 depends on the size of the filters, we made the filters fairly small ( $1.08^\circ$  FWHM) and dense (91  
260 filters arranged in a 13 horizontal / 7 vertical grid, each spaced  $0.83^\circ$  apart). We then discretized  
261 the filters by sampling them in a high-resolution 2D grid of 135 by 101 pixels spanning  $10^\circ$  by  
262  $5^\circ$ . The discretized filters ( $k$  filters by  $p$  pixels) were multiplied with a mask of the checkerboard  
263 stimulus on every trial ( $p$  pixels by  $n$  trials) so that the design matrix  $C$  contained predictions of  
264 the spatial channel responses on every trial of the mapping task.

265 To fit our estimated vRFs with a unimodal function, we used ridge regression to solve  
266 Equation 1. This is a common regularization method which sparsifies the regression solution by  
267 penalizing the regressors with many small weights (Hoerl and Kennard, 1970; Lee et al., 2013).  
268 This meant solving for an estimate of  $W$  by the following:

$$269 \quad (3) \quad \hat{W}^T = (CC^T + \lambda I)^{-1}CB^T,$$

270 where  $\lambda$  is the ridge parameter penalty term, and  $I$  is a  $k \times k$  identity matrix. We estimated an  
271 optimal  $\lambda$  for each voxel by evaluating Equation 3 over a range of  $\lambda$  values (0 to 750) for a  
272 balanced number of runs of the attention task (e.g., an equal number of runs from each attention  
273 condition). We then computed the Bayesian Information Criterion (BIC) for each of these  $\lambda$   
274 values, estimating the degrees of freedom in the ridge regression as:

$$275 \quad (4) \quad df = \text{trace}(C (C^T C + \lambda I)^{-1} C^T)$$

276 The  $\lambda$  with the smallest BIC was selected for each voxel. Since the attention comparisons are  
277 done within voxels, the varying  $\lambda$  penalty across voxels could not explain the attention effects we  
278 observed.

279 To select reliable voxels for analysis, we next implemented a set of conservative  
280 thresholding steps (**Table 1**). We first needed to select voxels with reliable visual responses, so  
281 we only kept voxels with trial beta weights that predicted at least 50% of the BOLD time courses  
282 in each scan session. Second, we only used voxels that could be successfully regularized with  
283 ridge regression. Any voxels with the maximum  $\lambda$  (750) were discarded, as this indicated that the  
284 ridge regression solution had not converged. Finally, we verified that the resulting regression  
285 model could predict an independent dataset, so we performed exhaustive leave-one-run-out cross  
286 validation for each attention condition. This ensured that the  $\lambda$  estimated across attention  
287 conditions produced reliable data for each condition separately. We estimated  $W$  using data from  
288 all but one run (Equation 3) and used this to predict the BOLD GLM trial estimate of the left-out  
289 run (Equation 2), separately for each condition. We then computed the mean correlation between  
290 the predicted & real BOLD GLM trial estimates across cross-validation folds for each voxel.  
291 Note that it is not possible to calculate a coefficient of determination on regularized data, since  
292 the process of ridge regression changes the scale of the predicted data (see supplemental

293 discussion in Huth et al., 2012). We only kept voxels where this cross-validation  $r > 0.25$  for all  
294 3 conditions.

295 To quantify each vRF, we fit the spatial RF profile of each voxel with a smooth 2D  
296 function with 4 parameters: center, size, baseline, and amplitude (**Fig 1b**; Equation 2). Here, we  
297 define the vRF baseline as the voxel's response that does not reliably depend on the position of  
298 the mapping stimulus (i.e., its constant offset). The vRF amplitude is defined as the spatially-  
299 selective increase in a voxel's response above this baseline. Together, these two parameters  
300 index how much of the voxel's response is due to a change in mapping stimulus position.  
301 Finally, the size and location parameters estimate the spatial selectivity and the spatial position  
302 preference of the vRFs, respectively. We first downsampled the vRFs by multiplying the  
303 estimated weights  $\hat{W}$  for each voxel (a  $1 \times k$  channel vector) by a smaller version of the spatial  
304 grid that contained the basis set (68 by 51 pixel grid;  $10^\circ$  by  $5^\circ$ ). This speeded up the process of  
305 fitting the pixelwise surface with Eq. 2. This fitting process began with a coarse grid search that  
306 first found the best fit in a discrete grid of possible vRF parameters (center sampled in  $1^\circ$  steps  
307 over the mapped portion of the visual field; size constant logarithmically sampled at 20 points  
308 between FWHM of  $10^{0.01^\circ}$  and  $10^{1^\circ}$ ). At each grid point, we estimated the best fit amplitude  
309 and baseline using linear regression. The grid point fit with the smallest root mean square error  
310 (RMSE) provided the initialization seed to a continuous error function optimization algorithm  
311 (fmincon in MATLAB). This fit had several constraints: the final solution must place the center  
312 within 2 grid points of the seeded fit (parameterized by position and size) and within the mapped  
313 visual field; the amplitude must be between 0 and 5; the baseline must be between -5 and 5  
314 BOLD z-score units. Occasionally, this nonlinear fitting algorithm did not converge and resulted  
315 in a larger error than the original seed. In this case we took the best fit grid point as the final fit.

316 To test whether vRF fit parameters changed when participants focused spatial attention at  
317 different positions, we compared fits during each attend periphery condition with fits during the  
318 attend fixation condition. We computed a difference score (attend peripheral – attend fixation) to  
319 describe the magnitude of the attentional modulation. For example, a difference score of  $-2^\circ$  in  
320 the FWHM of the vRF would indicate that the response profile width decreased when the  
321 participant attended to the peripheral target. This analysis revealed a subset of voxels with very  
322 large difference scores, which we determined to be due to noisy data or poor fits via manual  
323 inspection. Accordingly, we performed a final thresholding step for all vRF-based analyses: an  
324 elimination of outlier voxels with difference scores greater than three times the standard  
325 deviation of the population mean, where the population consists of the parameter difference  
326 scores for a given ROI (**Table 1**). After removing these outliers, we tested whether the vRF  
327 parameter difference scores differed significantly from 0 within a visual region of interest (ROI)  
328 by bootstrapping the distribution of difference scores across participants 10,000 times.

329 To determine if these vRF changes were modulated by their position in the visual field,  
330 we first calculated each vRF's distance from the attended location ( $v\_dist\_attn$ ) using its position  
331 during the fixation task. We then fit an  $n$ th order polynomial to the vRF difference scores as a  
332 function of  $v\_dist\_attn$ , where  $n = 0, 1, \text{ or } 2$ . This corresponds to a constant offset (0<sup>th</sup> order), a  
333 linear fit (1<sup>st</sup> order), or a quadratic or parabolic fit (2<sup>nd</sup> order). These fits were cross-validated by  
334 fitting on 50% of the vRF difference scores and calculating goodness-of-fit (residual sum of  
335 squares and  $R^2$ ) on each of the 10,000 cross-validation iterations. These cross-validation  
336 iterations also provided confidence intervals on the coefficients for each polynomial. The most  
337 parsimonious fit was chosen by performing a nested F-test on the average residual sum of  
338 squares for each polynomial model.

339 We also tested whether vRF attentional modulations depended on hemisphere or visual  
340 hemifield, akin to the results reported for IPS0 – IPS5 in Sheremata and Silver, 2015. We sorted  
341 the voxels in each attention condition as contralateral or ipsilateral to the attended target. We  
342 then performed a series of non-parametric bootstrapped tests similar to a two-way ANOVA with  
343 attended hemifield and voxel hemisphere as factors. The vRFs were resampled with replacement  
344 across subjects 10,000 times. We then evaluated the two main effects and the interaction by  
345 computing a difference in the means of the groups or a difference in the slope between the group  
346 means, respectively. None of the tests for the effect of hemisphere and the interaction survived  
347 FDR correction, so we do not report those results here. We speculate that this null result is likely  
348 due to a lack of reliable voxels in anterior parietal cortex areas IPS1-5 in our study, where  
349 previous reports have found larger laterality effects (Sheremata and Silver, 2015).

350

### 351 **Population analysis (1): Fine spatial discriminability metric**

352 To compute the spatial discriminability of a population of vRFs, we estimated the spatial  
353 derivative of each vRF at every point in the mapped visual field in  $0.1^\circ$  steps (**Fig 1C**). This was  
354 done by taking the slope of the vRF along the x and y direction at each pixel in the image of the  
355 visual field and squaring this value (Scolari and Serences, 2009, 2010). This measurement is a  
356 descriptor of how well a population code can discriminate small changes in the spatial  
357 arrangement of the stimulus array, which depends on the rising and falling edges of a tuning  
358 curve rather than the difference between the peak response and a baseline response (Regan and  
359 Beverley, 1985; Pouget et al., 2003; Butts and Goldman, 2006; Navalpakkam and Itti, 2007;  
360 Scolari and Serences, 2009, 2010). To restrict our measurements to the relevant area near the  
361 peripheral target, we computed discriminability values within 1 degree of the center of each



362 target across both spatial dimensions (x and y). These were summed and divided by the  
363 maximum discriminability value in that population to make the results comparable despite  
364 changes in vRF coverage or responsiveness.

365

366 **Population measurements (2): Stimulus reconstructions using an inverted spatial encoding**  
367 **model**

368 In addition to computing the discriminability metric described above, we also reconstructed an  
369 image of the entire visual field on each trial using a population-level encoding model. Compared  
370 to the local spatial discriminability index, this is a more sensitive method of assessing the amount  
371 of spatial information encoded in an entire population of voxels because it exploits the pattern of  
372 response differences across voxels, rather than treating each voxel as an independent encoding  
373 unit (Serences and Saproo, 2012; Sprague et al., 2015).

374 We trained the spatial encoding model using a procedure similar to the vRF estimation  
375 analysis described above (**Fig 4a**). This yields an estimated matrix of weights,  $\widehat{W}_2$ , which  
376 specifies how much each voxel in a region of interest responds to each of the spatial channels  
377 (Brouwer and Heeger, 2009; Serences and Saproo, 2012; Sprague and Serences, 2013; Sprague  
378 et al., 2015). We then solved Eq. 1 using the Moore-Penrose pseudoinverse with no  
379 regularization:

380 (5) 
$$\widehat{W}_2 = BC^T(CC^T)^{-1}$$

381  $C$  was constructed using a set of 54 evenly tiled spatial filters (Eq. 2; 9 horizontal / 6 vertical;  
382 spaced  $1.25^\circ$  apart;  $1.56^\circ$  FWHM).  $\widehat{W}_2$  was estimated using the data from the jittered position  
383 runs. This was done separately for each participant, using a training set balanced across the

384 conditions of interest (e.g., an equal number of attend left and attend right runs and all attend  
385 fixation runs, since fixation is the neutral condition).

386 To reconstruct a representation of the mapped visual space, we inverted the model and  
387 multiplied the pseudoinverse of the estimated weight matrix  $\widehat{W}_2$  with a test dataset from the  
388 discrete position runs ( $B_2$ ), yielding estimated channel activations for each trial ( $C_2$ ;  $k_2$  channels  
389 by  $t$  test trials) (Equation 6). Thus, we refer to this analysis as the inverted encoding model  
390 (IEM).

391 (6) 
$$\hat{C}_2 = \left( \widehat{W}_2^T \widehat{W}_2 \right)^{-1} \widehat{W}_2^T B_2$$

392 Because of mathematical constraints on inverting  $W_2$  (number of voxels must be greater than  
393 number of channels), we included all voxels in each ROI instead of just the subset of well-fit  
394 voxels used in the vRF analyses described above. We computed Eq. 6 twice using different test  
395 datasets, once for the discrete position attend left runs and once for the discrete position attend  
396 right runs.

397 When we multiply the resulting channel activations by a grid of pixels that define the  
398 spatial channels, we obtain a spatial representation of the entire visual field on each trial. This  
399 image contains a stimulus reconstruction showing where the checkerboard should have been  
400 given the trained model and the activation pattern across all voxels in the independent test set.  
401 The stimulus reconstructions were then fit in the same manner as the vRFs, using Eq. 1 to  
402 estimate the center, size, amplitude, and baseline (mean fit RMSE across all ROI reconstructions  
403 0.114; 95% CI [0.102, 0.312]). Here, the baseline is an estimate of the multivariate  
404 reconstruction that is spatially non-selective—i.e., not significantly modulated by the position of  
405 the mapping stimulus. The amplitude describes the maximal increase in that reconstruction  
406 relative to baseline when the mapping stimulus is on the screen.

407           To assess how attention changed reconstructions of the mapping stimulus across the  
408 visual field, we first computed a difference score that described the effect of attention by folding  
409 the visual field in half (i.e. collapsing across hemifield) and comparing parameters in the  
410 attended vs. ignored hemifield. We excluded the reconstructions that fell along the vertical  
411 meridian (3 of 51 stimulus positions). This allowed us to control for the overall effect of  
412 eccentricity while remaining sensitive to other spatial patterns in stimulus reconstruction  
413 modulations.

414           We then set up a single factor repeated measures omnibus ANOVA to determine which  
415 pairs of ROI and parameter (e.g., V1 size, V1 amplitude, etc.) were affected by either attention or  
416 Euclidean distance from the target stimuli. The attention factor had two levels (attend/ignore)  
417 and the distance factor had 6 levels (6 evenly spaced distance bins from 0° to 2.54°). Based on  
418 the results of this omnibus test, we tested any significant ROI-parameter combination in a 2-way  
419 repeated measures ANOVA of attention by distance. To estimate the p-values for these tests, we  
420 generated empirical null distributions of the F-scores by randomizing the labels within each  
421 factor 10,000 times within each participant. Reported p-values are the percentage of the  
422 randomized F-scores that are greater than or equal to the real F-scores.

423

### 424 **Population analysis (3): Layered spatial encoding model to link vRFs to multivariate** 425 **stimulus reconstructions**

426 In order to test how changes in the response properties of the underlying vRFs contributed to  
427 changes in the fidelity of region-level stimulus reconstructions, we generated simulated patterns  
428 of voxel activity on every trial by predicting the response to each stimulus based on the vRF fit

429 parameters. We then used this simulated data to estimate and invert a population-level spatial  
430 encoding model, as described above (**Fig 6a**).

431 Note that for these simulations, we could only use well-fit voxels to generate simulated  
432 BOLD timeseries. This constrained the analysis to ROIs with at least as many vRFs as spatial  
433 filters used to estimate the spatial encoding model. To ensure that we could include most  
434 participants in the layered encoding model analysis, we created two large ROIs by merging the  
435 smaller retinotopically defined regions described above. The occipital ROI consisted of V1, V2,  
436 V3, and V4 defined for each subject. The posterior parietal ROI consisted of V3A/B and IPS0.  
437 The vRFs in the parietal ROI show distinct patterns of attentional modulations (**Fig 2e**),  
438 suggesting that V3A/B and IPS0 are both anatomically and functionally distinct from the  
439 occipital regions (see also de Haas et al, 2014). Although merging ROIs increased the number of  
440 voxels available for the encoding model analysis, we still did not have enough voxels in the  
441 parietal ROI to estimate the layered encoding model for 3 of the 7 participants (AL, AR, AU).  
442 However, the remaining data from 4 participants were sufficient to produce stable, subject-  
443 averaged results.

444 To simulate each voxel's BOLD response on every trial that the participant completed in  
445 the real experiment, we first created a high-resolution set of spatial channels (21 by 11 channels  
446 spaced  $0.5^\circ$  apart, FWHM =  $0.65^\circ$ ) and generated weights for each channel based on the vRF fit  
447 obtained from prior analysis. That is, we evaluated Eq. 2 for each channel at the vRF's fit center  
448 and adjusted the response gain by multiplying this result by the fit amplitude and adding the fit  
449 baseline. We then added independent Gaussian noise to each of these channel weights,  
450 simulating a small amount of variance in the voxel's response ( $\sigma = 0.5$ ). Each voxel's channel  
451 weights were then multiplied by the idealized channel response on each trial (that is, the channel

452 filter convolved with the stimulus mask), effectively simulating the BOLD response on each trial  
453 for the entire population of voxels based on their measured vRFs. We added Gaussian noise to  
454 this simulated response as well ( $\sigma = 0.5$ ). We then computed stimulus reconstructions using the  
455 same method as described above (the IEM in **Population analysis (2)**), averaging resulting  
456 reconstructions across participants and like positions before fitting.

457       To ensure the stability of the reconstructions that were based on simulated data, we  
458 repeated the simulations 100 times and averaged across the fits of all iterations to generate the  
459 plots in **Fig 6b**. Then, to compare how well the layered model reproduced the attentional  
460 modulations observed in stimulus reconstructions generated with real data, we calculated an  
461 error metric between the layered IEM and the real data. We first calculated reconstruction  
462 difference scores across attention condition (attended – ignored; see **Population analysis (2)**).  
463 This yielded 24 difference scores each for both attention conditions in both the layered IEM data  
464 and the empirical data. Since the empirical data did not have any repeated iterations, we  
465 averaged across all 100 iterations of the layered model to match the dimensionality of the real  
466 reconstructions (2 conditions x 24 difference scores x 4 parameters). We could then calculate the  
467 root mean square error (RMSE) between the difference scores from the full empirical dataset (i.e.  
468 the data shown in **Fig 5**) and the modeled data. This was used as a metric to describe the  
469 goodness-of-fit of each layered IEM.

470       We then tested how different vRF attentional modulations contributed to changes in the  
471 population-level stimulus reconstructions. To test how shifts in vRF centers contributed to  
472 population-level information, we modeled voxels that had the same fit center across both  
473 attention conditions, simulated their BOLD responses on each trial, and generated stimulus  
474 reconstructions from these data. The voxel's vRF center was defined as the vRF center fit from

475 the neutral attend fixation data. A similar procedure was repeated for all reported combinations  
476 of parameter changes across conditions. Again, whichever parameter was held constant took its  
477 value from the neutral attend fixation condition.

478 To calculate the confidence intervals on the RMSE changes in **Fig 6c**, we resampled with  
479 replacement across the 100 model iterations and refit the average across these 100 instances.  
480 This resampling procedure was repeated 500 times to generate a distribution of fits to the model  
481 data. We then took the difference between the RMSE of the null model, in which no parameters  
482 varied between attention conditions, and the RMSE of the model which held some number of  
483 vRF parameters constant across attention conditions.

484

## 485 **RESULTS (3,709 words)**

### 486 **Modulations of vRF properties with spatial attention**

487 We estimated single voxel receptive fields (vRFs) for each voxel in 6 retinotopically-identified  
488 visual areas from V1 to IPS0. The estimation of vRFs was done independently for each attention  
489 condition so that we could compare a single voxel's spatial tuning across conditions.

490 To confirm that the fit sizes were consistent with previous results, we fit a line to the  
491 estimated sizes as a function of the vRF center eccentricity. First, we combined all vRFs across  
492 participants and conditions in each ROI. We then binned the vRF centers every  $0.25^\circ$  from  
493 fixation and calculated the mean size (**Fig 2b**). We first replicated an increase in vRF size with  
494 increasing eccentricity, and an increase in the slope of this relationship across visual regions  
495 (Gattass et al., 2005; Dumoulin and Wandell, 2008; Amano et al., 2009; Harvey and Dumoulin,  
496 2011) (**Fig 2b**). These observations confirm that our method produced reasonable vRF estimates  
497 that were consistent with previous reports.

498

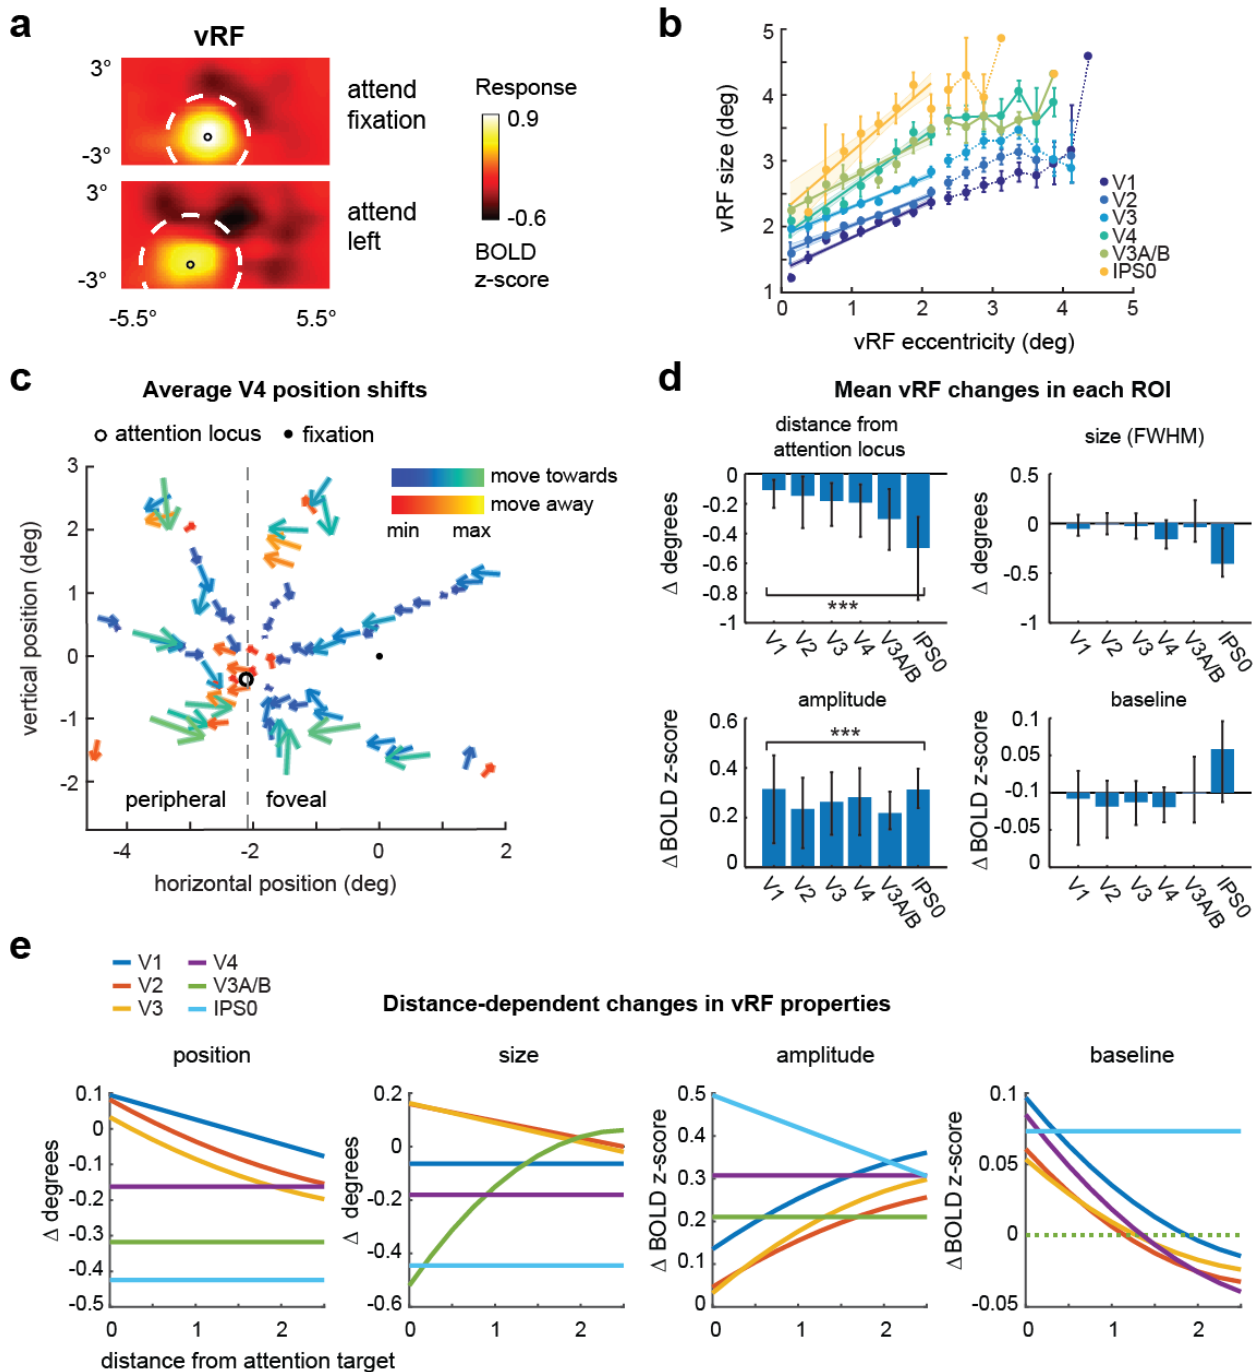

499  
500

**Figure 2.** Changes in voxel receptive fields (vRFs) across attention conditions. We separately estimated vRFs for every voxel in visual and posterior parietal areas, discarding poorly estimated or noisy voxels (Table 1). Unless otherwise specified, figure data is averaged across subjects and error bars show 95% confidence intervals computed by resampling the data distribution. (a) An example vRF shows that attending covertly to the left location shifts the center of the receptive field profile to the left, when compared to the neutral attend fixation condition. Voxel is from

507 subject AR in area V3A/B. **(b)** Our vRF estimates reproduced the canonical size-eccentricity  
508 relationship (positive slope in all ROIs,  $p <$  minimum possible p-value, e.g., 1/10000 iterations)  
509 and the increase in slope between visual regions. **(c)** Preferred position changes of V4 vRFs with  
510 covert spatial attention. We binned each vRF by its position during the attend fixation condition.  
511 The origin of each arrow is the center of each position bin. The end of the arrow shows the  
512 average position shift of the vRFs within that position bin during the attend peripheral conditions  
513 (left/right are collapsed and shown as attend left). The majority of vRFs shift toward the attended  
514 location (blue-green color map vs. red-yellow). **(d)** Mean changes in vRF parameters (attend  
515 peripheral target – attend fixation) in each visual area. **(e)** Attentional modulations of each vRF  
516 parameter plotted by the vRF's distance from the attention target computed from its position  
517 during the attend fixation task (**Table 2**).  
518

519         Next, we examined how covert attention to the peripheral attention targets modulated  
520 vRF properties, relative to the attend fixation condition. Overall, the center position of vRFs  
521 shifted significantly closer to the attended location ( $p <$  0.005 in all ROIs, **Fig 2d**). This finding  
522 is consistent with previous reports in humans and in monkeys for both covert attention tasks and  
523 saccade tasks (Womelsdorf et al., 2006, 2008; Klein et al., 2014; Zirnsak et al., 2014).

524         While we did observe changes in the size of individual vRFs, the mean change was not  
525 significantly different from zero ( $p >$  0.05 in all ROIs). Size increases have been previously  
526 reported in tasks that required subjects to attend to the mapping stimulus, which moved on each  
527 trial (Sprague and Serences, 2013; Kay et al., 2015; Sheremata and Silver, 2015). Accordingly, if  
528 attention causes the center of RFs to shift toward the attended target, these combined shifts in  
529 position would average out to form a larger RF estimate. In contrast, mapping vRFs while  
530 maintaining a fixed locus of attention would nullify the size increase, consistent with the results  
531 we observed (**Fig 2d**). Another study which also found increases in vRF size with attention  
532 required subjects to attend the fixation point while they manipulated the perceptual load, or  
533 difficulty, of the attention task (de Haas et al., 2014). In our study, we intentionally kept task  
534 performance constant and could not evaluate effects of difficulty on the parameters of vRFs.



535 We also found an overall increase in vRF amplitude with attention ( $p < 0.001$  for all  
536 tests). Since these measures were calculated relative to a fixation task, these data suggest that  
537 covert spatial attention to a peripheral location caused widespread position and gain modulations  
538 in all vRFs across the visual field.

539 It is unclear whether these attentional modulations are limited to areas near the attended  
540 target, or whether they are uniform across the visual field. For example, vRF position shifts  
541 could result in a radial convergence of RFs towards the attended target, or a uniform shift of RFs  
542 along a vector extending from fixation to the attention or saccade target (Tolias et al., 2001;  
543 Klein et al., 2014; Zirnsak et al., 2014). Furthermore, reports of other RF properties (such as  
544 size) modulating with attention have been mixed (Connor et al., 1996, 1997; Womelsdorf et al.,  
545 2008; Niebergall et al., 2011; Sprague and Serences, 2013; de Haas et al., 2014; Klein et al.,  
546 2014; Kay et al., 2015; Sheremata and Silver, 2015). We therefore examined whether each of the  
547 vRF parameter changes was dependent on the vRF's location in the visual field, relative to the  
548 attended location. First, we created radial distance bins centered on the left or right attended  
549 locations, and sorted voxels into these bins based on their preferred position during the fixation  
550 condition. After this sorting procedure, data from the right condition were flipped and collapsed  
551 with the left condition.

552 When we plotted vRF position changes in each bin, we found that spatial attention caused  
553 vRF position shifts that converged on the attended location (two-tailed sign test on vector  
554 direction,  $p < .001$  in all ROIs). That is, vRFs shifted closer to the attended location (**Fig 2c**),  
555 compared to when subjects attended fixation (mean shift across all vRFs and ROIs:  $-0.239^\circ$ , 95%  
556 C.I. [-0.566, -0.048], **Fig 2d**). Note that small eye movements toward the attended location  
557 cannot explain receptive field convergence: this would cause all vRFs to shift in the same

558 horizontal direction, rather than radially converging on one point. These data are consistent with  
559 results from both humans (Klein et al., 2014) and macaques (Connor et al., 1996, 1997,  
560 Womelsdorf et al., 2006, 2008) that use a similar task. However, the prior study in humans  
561 focused only on vRFs with preferred locations that were foveal to the attended location, and the  
562 studies in macaques only report RF position changes in V4 and MT. By contrast, our data show  
563 that vRF centers converge on the attended location across all visual areas, including primary  
564 visual cortex, and that this pattern of modulations includes vRFs peripheral to the attended target.

565         These plots (**Fig 2a, 2d**) also suggested that vRFs farther from the attended location  
566 underwent larger position changes than vRFs near the attended location. That is, the magnitude  
567 of the attentional modulation may be dependent on the distance between the vRF and the  
568 attended target. To test for this, we fit a polynomial to the vRF parameter changes as a function  
569 of distance from the attended location (**Materials and Methods**). We selected the most  
570 parsimonious fit ranging from a mean change in vRF parameter (0<sup>th</sup> order polynomial) to a  
571 parabolic change (2<sup>nd</sup> order polynomial) by conducting a nested F-test (**Table 2**). The best  
572 polynomial fits are plotted in **Fig 2e**.

573         This analysis allowed us to characterize trends in vRF attentional modulations across  
574 space. Note that it also implicitly tests whether voxels contralateral to the attended target respond  
575 differently than ipsilateral voxels. This is because vRFs near the attended target will mostly  
576 originate from the contralateral side of visual cortex. Therefore, any fit lines with a significant  
577 slope imply there is a difference between contralateral and ipsilateral voxels (Sheremata and  
578 Silver, 2015). A separate test described in **Materials and Methods** confirmed that contralateral  
579 voxels differed significantly from ipsilateral voxels in the areas where we saw the highest fit  
580 slopes in **Fig 2e** (FDR-corrected  $p < .05$  for position: V1, V2; size: V3; amplitude: V3, IPS0).

581 However, since the fit lines illustrate how these changes occur over space, we discuss those data  
582 here instead (**Fig 2e**).

583 In early visual areas V1 through V3, vRFs near the attention target were slightly repelled  
584 from the target, whereas vRFs farther from the target were attracted towards the target. In later  
585 visual areas, vRFs were uniformly attracted towards the attention target. We saw a similar  
586 pattern of results with size modulations: early visual areas showed an increase in vRF size near  
587 the attention target, and decreased size farther away. However, in areas V3A/B and IPS0, vRF  
588 size decreased near the attention target.

589 The pattern of vRF amplitude modulations was also segregated between the early and  
590 later visual areas. All vRFs increased in amplitude with attention, but the slope of this  
591 relationship inverted from early to later visual areas. In V1 – V3, the slope is positive, such that  
592 voxels  $\sim 2^\circ$  away from the attention target increase in amplitude more than voxels right at the  
593 target position. The amplitude increase is constant in V4 and V3A/B. Finally, in IPS0, the slope  
594 inverts to become negative, so that voxels near the attention target increase in amplitude more  
595 than voxels farther away. Lastly, we found an increase in vRF baseline near the attended target in  
596 V1 – V4, but a uniform increase in baseline in IPS0. Overall, we found that the type and  
597 magnitude of the attentional modulation in different visual areas changes as a function of the  
598 spatial relationship between vRFs and the attended target. This is consistent with findings from  
599 macaque neurophysiology, which had suggested that amplitude and size changes depend on  
600 where the RF is located in relation to the attended target (Connor et al., 1996; Niebergall et al.,  
601 2011).

602 Note that these fits only describe the gain modulations with respect to the voxel's  
603 position during the attend fixation task. However, these parameter changes likely interact with

604 one another, such that a voxel that shifts toward the attended location will also increase in  
 605 amplitude. Hence, to determine how the joint patterns of vRF modulations change the spatial  
 606 information content of a representation, in the next section we discuss two different population-  
 607 level measures that combine data across the population of vRFs in each ROI.

608

609 **Increases in spatial discriminability depend primarily on vRF position shifts**

610 Next, we assessed how different types of RF modulations influenced the precision of  
 611 population-level codes for spatial position. We first computed a discriminability metric that  
 612 described the ability of a population of tuning curves (here, voxel receptive fields) to support fine  
 613 spatial judgments (**Materials and Methods**). When we computed this metric based on the  
 614 measured vRF properties from each condition, spatial discriminability near the attended target  
 615 increased relative to the ignored target in the opposite visual hemifield (**Fig 3a**).

616

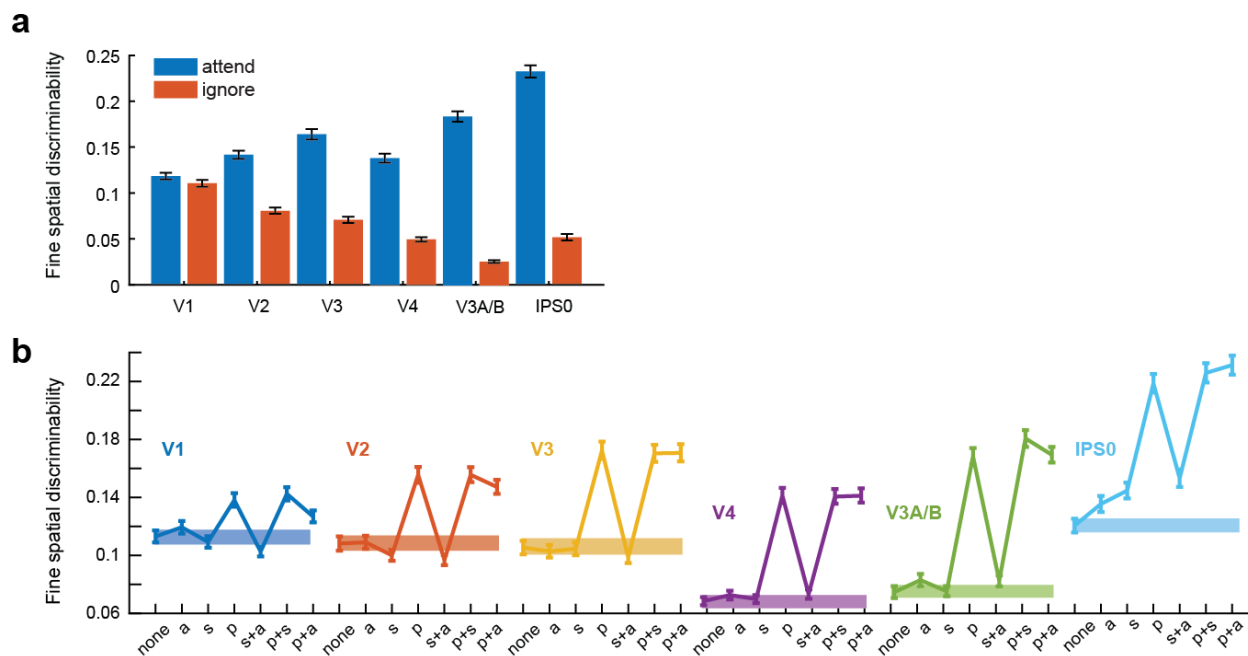

617

618

619 **Figure 3.** Spatial discriminability increases with attention and is mediated by position changes in  
 620 vRFs. Error bars depict bootstrapped 95% CIs. (a) We formulated a measurement to describe the

621 ability of a population of voxels to make fine spatial discriminations around the attention target.  
622 We used the properties of each voxel's spatial tuning curve to make this measurement  
623 (**Materials and Methods**). Spatial discriminability increased when subjects attended the target,  
624 compared to when they ignored the target in the opposite hemifield (resampled  $p < \text{minimum}$   
625 possible  $p$ -value (1/1000) for all ROIs for all ROIs). **(b)** The discriminability metric was  
626 recomputed for vRFs with a variety of attentional modulations. (*none* = vRF parameters during  
627 the neural attend fixation condition; *a* = amplitude; *s* = size; *p* = position). Spatial  
628 discriminability increased significantly when we applied position changes measured during the  
629 attend L/R task to the vRFs compared to when we applied no parameter changes (solid bar). By  
630 contrast, applying size changes did not change spatial discriminability in most ROIs, although it  
631 did cause a small increase in IPS0.  
632

633 We then tested how different types of vRF modulations (such as size changes or position  
634 shifts) affected this spatial discriminability metric. As a baseline comparison, we first computed  
635 discriminability based on vRFs estimated during the attend fixation runs for each subject. We  
636 then added different sets of observed attentional modulations to the population before  
637 recomputing spatial discriminability. For example, we shifted all the vRF centers to match the  
638 measurements when a subject was attending to the left target and computed discriminability near  
639 the attended target. Since the response baseline of a vRF does not affect the discriminability  
640 metric, we excluded this type of attentional modulation from these analyses.

641 Across all ROIs, we found that vRF position shifts played the biggest role in increasing  
642 fine spatial discriminability compared to changes in size or changes in amplitude (**Fig 3b**).  
643 Position modulations alone led to a large increase in spatial discriminability, while other  
644 combinations of parameter modulations only had an impact if we added in position shifts (i.e. a  
645 change in size and position increased discriminability, but size alone did not). The only departure  
646 from these patterns was observed in IPS0, where all attentional modulation types increased  
647 spatial discriminability, but position changes increased spatial discriminability the most.

648

649 **Spatial attention increases the fidelity of population-level stimulus reconstructions**

650 By design, the spatial discriminability metric we computed is only informative about  
651 local spatial representations, and cannot assess how different patterns of vRF modulations might  
652 result in representational changes across the visual field. To address this point, we built a  
653 multivariate spatial encoding model to measure how attention changes the representations of  
654 visual information in disparate parts of space. This also allowed us to further test the effects of  
655 vRF modulations on the encoding properties of the population, including response baseline  
656 changes that were not captured by our discriminability metric.

657 The spatial inverted encoding model (IEM) reconstructed an image of the entire visual  
658 field on each test trial. We first trained the model using the responses of each voxel on a set of  
659 training trials with known mapping stimulus positions. We then created image reconstructions on  
660 independent test trials by inverting the model and multiplying it by the voxel responses during  
661 each test trial (**Fig 4a; Materials and Methods**). Each image contained a representation of  
662 where the mapping stimulus should have been given the pattern of voxel activations on that  
663 particular trial. The IEM successfully reconstructed the task-irrelevant mapping stimuli using  
664 activation patterns across voxels in each visual area from V1 through IPS0 (**Fig 4b**; grand mean  
665 error between fit and actual position  $2.40^\circ$ , 95% CI [ $0.55^\circ$ ,  $4.97^\circ$ ]).

666

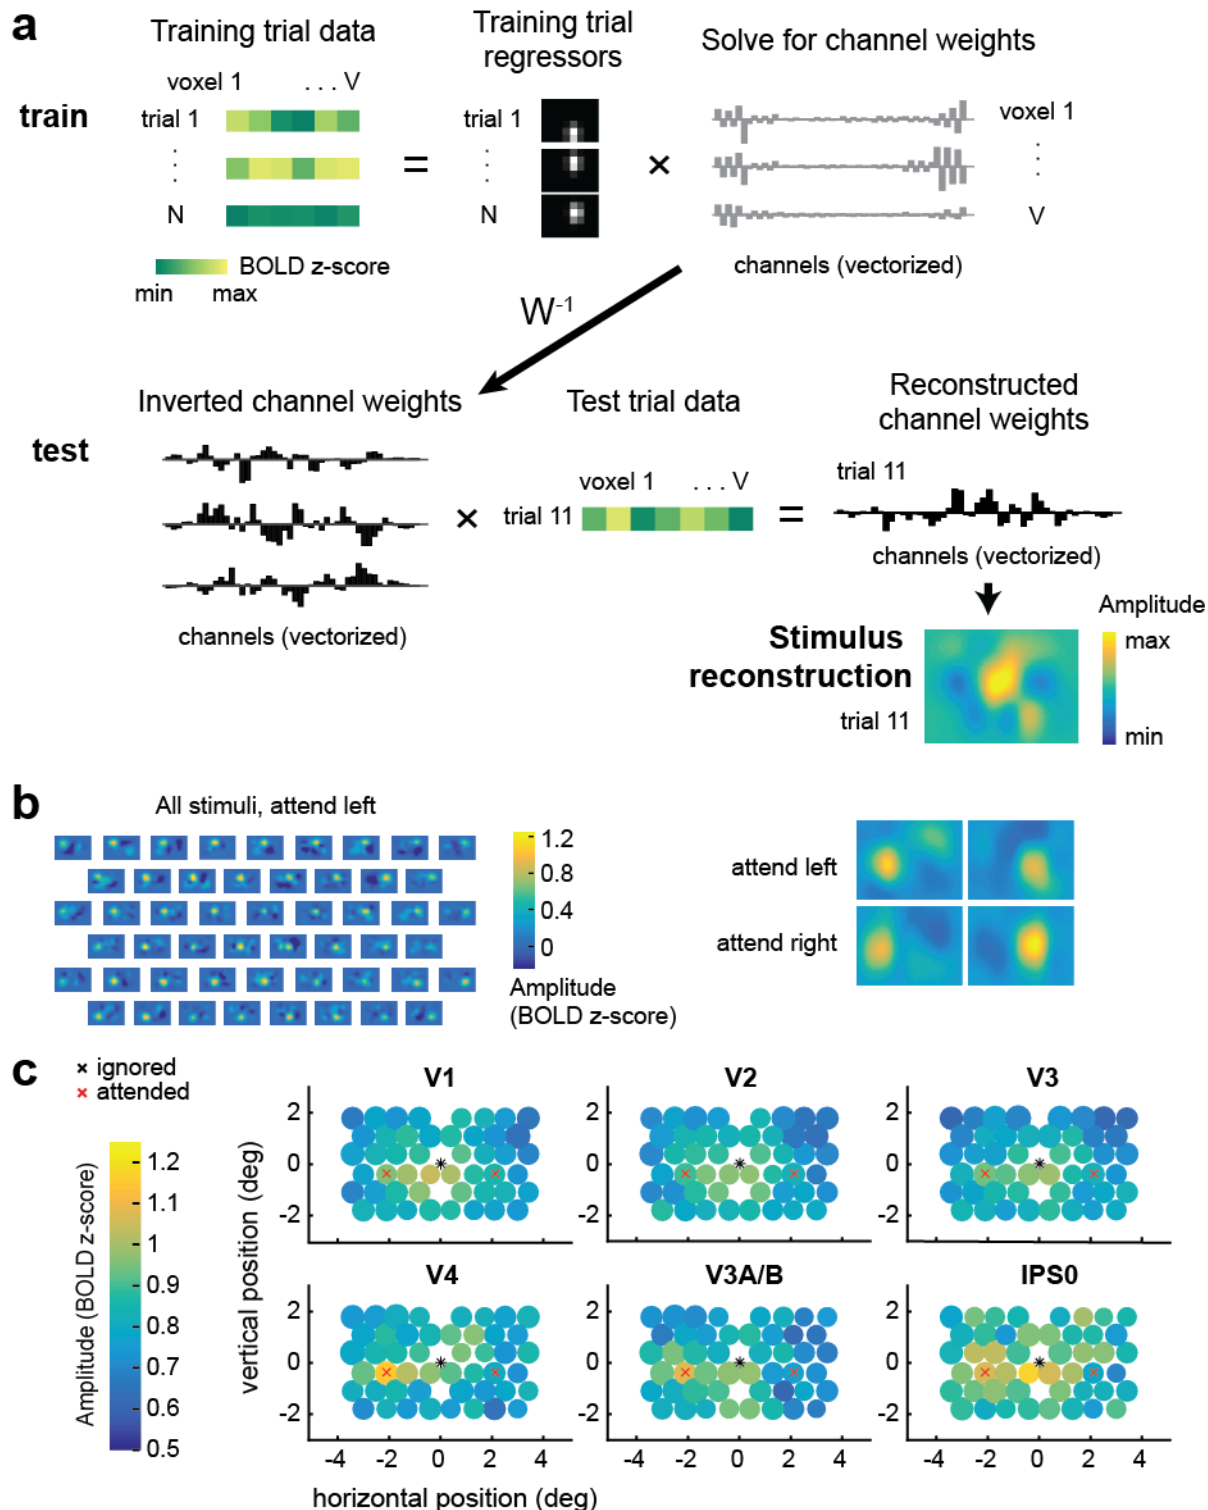

667  
668  
669  
670  
671  
672

**Figure 4.** Multivariate inverted encoding model (IEM) used to reconstruct the mapping probe stimuli. (a) To train the IEM, we first take the BOLD data from all voxels within a visual region from a subset of training trials. Then, we solve for a set of channel weights using least squares regression. To reconstruct the stimulus, we invert this weight matrix and multiply it with BOLD

673 data from the same voxels during a test trial. This yields a reconstructed channel response  
674 profile, which can be transformed into a reconstruction of the mapping stimulus on every trial in  
675 each attention condition. Data shown are examples from participant AR for a subset of V1  
676 voxels. **(b)** Example stimulus reconstructions for participant AI, V1. These reconstructions were  
677 averaged across trials with the same position, yielding 51 reconstructions – one for each unique  
678 position in the test dataset. In the left panel, the same averaged position reconstructions are  
679 shown for each condition. The amplitude on the left is higher when attending left, and on the  
680 right when attending right. **(c)** Average reconstruction sizes and amplitudes for each stimulus  
681 position (collapsed across condition; left is attended). The diameter of the circle depicts the  
682 average fit FWHM of the reconstructions at that spatial position. Reconstruction amplitude was  
683 greater in the attended hemifield compared to the ignored hemifield in areas V3A/B and V4 ( $p$   
684  $\leq 0.005$ ; **Table 3; Fig. 5**).  
685

686 We used these stimulus reconstructions as a proxy for the quality of the spatial  
687 representations encoded in a population of voxels. This is line with previous studies showing that  
688 stimulus reconstructions change in amplitude or size as a function of cognitive demands.  
689 (Brouwer and Heeger, 2013; Ester et al., 2013; Sprague and Serences, 2013; Sprague et al., 2014,  
690 2015, 2016).

691 First, we compared how reconstructed representations of each mapping stimulus changed  
692 as subjects shifted their spatial attention. We ran a repeated measures ANOVA of *attention*  $\times$   
693 *distance bin* for each reconstruction fit parameter (**Materials and Methods**). Here, a main effect  
694 of attention would suggest that stimulus reconstructions in the attended hemifield changed in a  
695 consistent way compared to the ignored hemifield. A main effect of distance would suggest that  
696 stimulus reconstruction changes had a consistent spatial pattern across both the attended and  
697 ignored hemifields. This would occur when a stimulus' representation was altered with distance  
698 from the attention target. For example, the stimulus reconstruction center should vary linearly  
699 with the stimulus' true distance from the attention target. And lastly, an interaction effect would  
700 suggest that the distance effect was dependent on whether the reconstruction belonged to the  
701 attended or ignored hemifield. In our task, the reconstructed stimuli are always irrelevant to the



702 task of the observer. We therefore predicted an interaction effect where spatial attention would  
 703 selectively modulate stimulus reconstructions within the hemifield of the attended location, but  
 704 not the opposite hemifield (Connor et al., 1996, 1997).

705 We found that reconstruction amplitude was selectively increased near the attended  
 706 location in V4, V3A/B, and IPS0 (interaction effect, bootstrapped  $p < 0.005$ ; **Fig 5; Table 3**).  
 707 This can be interpreted as a local boost in SNR. Prior reports found that attending to the mapping  
 708 stimulus – as opposed to attending to a peripheral target in the current experiment – caused an  
 709 increase in the amplitude of all stimulus reconstructions (Sprague and Serences, 2013). That is,  
 710 representations of task-relevant stimuli increased in SNR. We find here that even representations  
 711 of task-*irrelevant* stimuli near the attended region of space increase in amplitude, consistent with  
 712 the idea of an attentional ‘spotlight’ which boosts the fidelity of spatial representations near the  
 713 attention target.

714

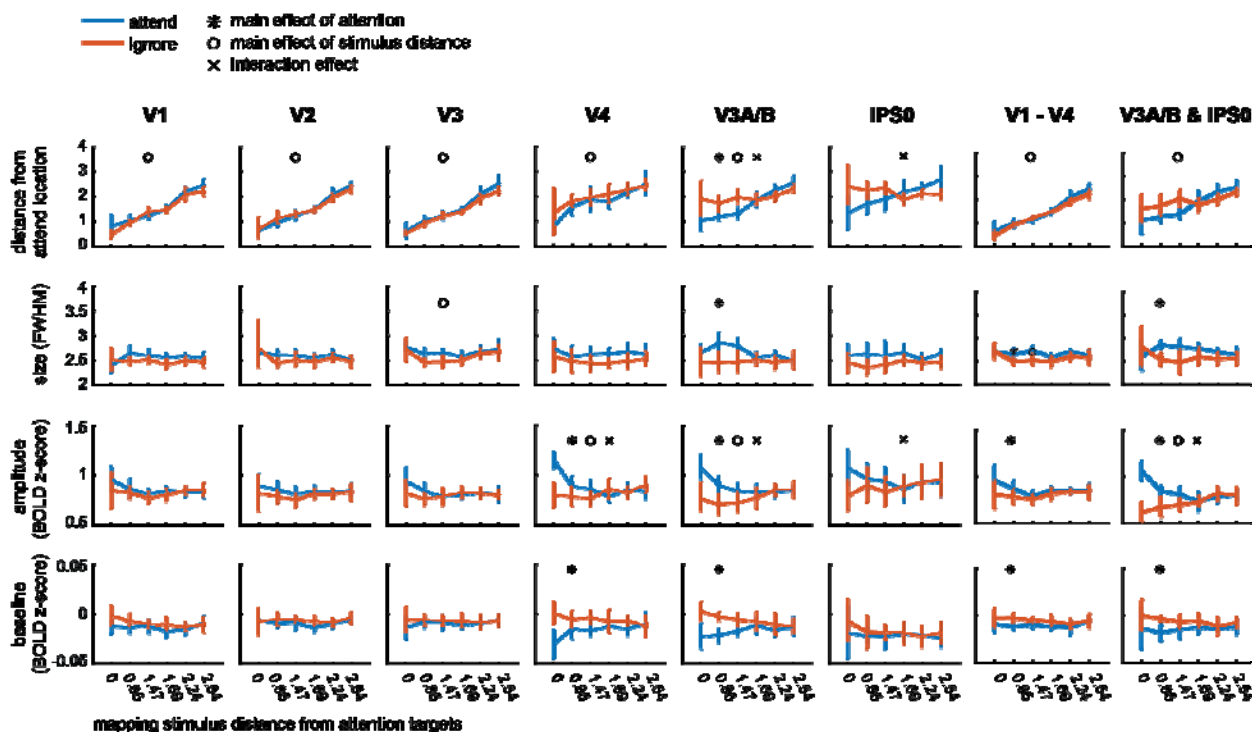

715

716 **Figure 5.** Reconstruction parameters as a function of mapping stimulus distance from the  
717 covertly attended locations and attention hemifield (attended vs. ignored). See **Table 3** for  
718 complete list of p-values.

719

720         Although the amplitude interaction effect was present in most visual areas we tested (**Fig**  
721 **5**), we found other effects limited to V3A/B and IPS0 that involved modulations in stimulus  
722 representations in the ignored hemifield. In these regions, we found that stimulus reconstructions  
723 in the ignored hemifield shifted away from the ignored target location (interaction, bootstrapped  
724  $p < 0.005$ ). We also observed a relative size increase near the ignored attention stimulus in IPS0  
725 (interaction, bootstrapped  $p < 0.005$ ). These results suggest that stimulus reconstructions in the  
726 ignored hemifield are less spatially precise in posterior parietal cortex. Finally, there was also a  
727 main effect of attention on reconstruction size and baseline in areas V3, V4 & V3A/B  
728 (bootstrapped  $p$ 's  $\leq 0.005$ ). However, unlike the interaction effect in IPS0, these size and  
729 baseline changes did not vary as a function of distance between the reconstruction and the  
730 attended target location.

731

732 **Using a layered encoding model to explore how single voxel RFs change population-level**  
733 **codes**

734         In our final analysis, we used a layered spatial encoding model to determine how changes  
735 in vRF properties affected the representations of mapping stimuli in the multivariate  
736 reconstructions discussed in the previous section (**Fig 1c; Fig 4a**). The goal of this analysis was  
737 to determine which vRF modulations contribute the most to the observed increase in the  
738 amplitude of stimulus representations around the attended location (**Fig 5**). This analysis thus  
739 complements our analysis of the spatial discriminability metric which demonstrated that vRF

740 position changes significantly increased the ability of the population to make fine spatial  
741 discriminations near the attention target (**Fig 3c**).

742         The layered spatial encoding model we built links the response properties of single  
743 voxels to the encoding properties of a whole population of voxels in a region of visual cortex  
744 (**Fig 6a**). In the first layer of the model, we used the fit vRFs to generate simulated BOLD data  
745 from each voxel under different attention conditions. We then repeated the multivoxel stimulus  
746 reconstruction analysis on this simulated data to model population results for the second layer of  
747 the model. This approach allowed us to perform virtual experiments to test how changes in the  
748 first layer impacted the second layer. That is, we manipulated which vRF parameters changed  
749 with attention (first layer) and observed the resulting changes in the population-based stimulus  
750 reconstructions (second layer). For example, we could test whether an overall increase in vRF  
751 response gain with attention would be necessary or sufficient to reproduce the amplitude  
752 increases observed in the empirical stimulus reconstructions reported in **Fig 5**. These virtual  
753 experiments also allowed us to compare the relative impact of one type of response modulation  
754 (e.g. size changes) with other types of response modulations (e.g. position shifts).

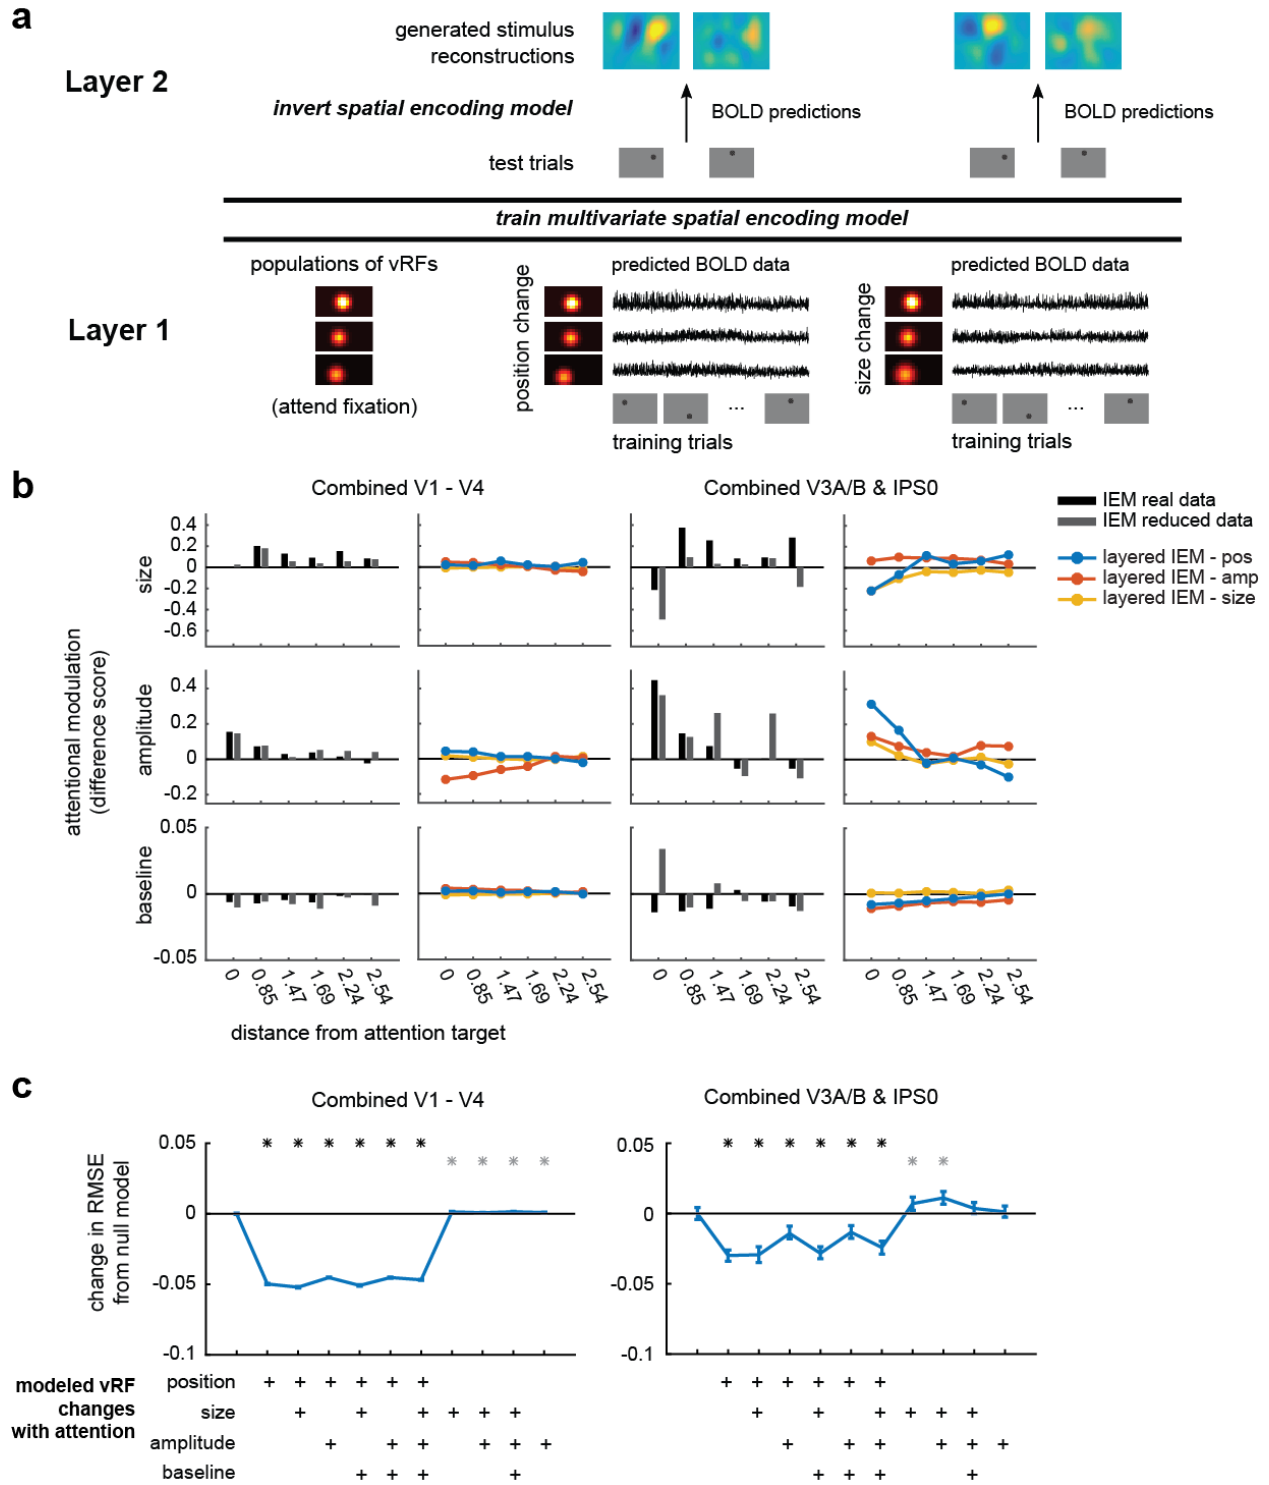

755  
756

757 **Figure 6.** A layered spatial encoding model reveals how different sets of vRF changes lead to  
758 enhancements in multivariate stimulus reconstructions. (a) The first layer of the model uses the  
759 vRF fits to generate BOLD data from every subject's real trial sequence. Then the BOLD data  
760 from all voxels within one ROI is used to train a multivariate spatial encoding model and  
761 reconstruct the mapping stimuli. (b) Change in reconstruction amplitude in the attended vs. the

762 ignored hemifield. We only show reconstruction parameters with significant attentional  
763 modulations in the prior IEM analysis (**Fig 5, Table 3**). Stimulus reconstructions computed with  
764 a reduced number of voxels (gray bar) largely reproduce the pattern of attentional modulations  
765 observed in IEMs computed with all voxels (black bar). Furthermore, a comparison of layered  
766 IEMs using simulated data revealed that vRF position changes (blue lines) in the first layer of the  
767 model are better at reproducing the amplitude modulations in the stimulus reconstructions of the  
768 parietal ROI than models which simulate changes in vRF size or amplitude (yellow & red lines).  
769 (c) RMSE between each set of IEM fits and the full empirical dataset fits shown in **Fig 5**. The  
770 null baseline model (far left) is a layered IEM where the vRF parameters are the same across all  
771 attention conditions. We then added vRF attentional modulations for each parameter as shown in  
772 the matrix below the plot, where all models with position changes are on the left side. \* indicate  
773 an FDR-corrected p-value <.05 for models that differed significantly from the null baseline  
774 model. Gray asterisks indicate an increase in RMSE from the null model, whereas black asterisks  
775 indicate a decrease.  
776

777           Since the population-level stimulus reconstructions require many voxels from each  
778 subject to produce stable and reliable results, we combined the data across several regions in  
779 each individual subject before estimating the IEM (see **Materials and Methods** for a longer  
780 discussion). This yielded one occipital region that combined data from areas V1, V2, V3 and V4,  
781 and one posterior parietal region that combined data from V3A/B and IPS0. We repeated the  
782 IEM analysis described in the previous section on these larger regions, and found that the pattern  
783 of attentional modulations observed earlier was consistent in the large ROIs (**Figure 5**). Next, to  
784 verify whether we could perform the layered IEM using a reduced number of voxels, we re-ran  
785 the IEM analysis but only used the data from voxels with well-fit vRFs. The reduced dataset with  
786 fewer voxels reproduced the main pattern of results we observed in the previous section. In  
787 particular, covert attention led to an increase in the amplitude of reconstructions near the locus of  
788 attention (**Fig 6b**, black vs. gray bars).

We then investigated the contribution of each vRF parameter to the population-level stimulus reconstructions, in a comparison akin to the spatial discriminability analysis in **Fig 3**. A model that only simulated the observed vRF amplitude or vRF size modulations did not predict the observed increase in reconstruction amplitude near the attention target (**Fig 6b**, red lines). However, a layered model that only simulated vRF position changes did predict a large increase in reconstruction amplitude near the attention target in the parietal ROI (**Fig 6b**, blue line on right). This is consistent with the effects observed in the full dataset (**Fig 5, Table 3**), where we only observed an interaction of stimulus distance and attention in the parietal ROI.

To more formally quantify each manipulation of the layered IEM, we calculated an error metric to describe how well each model reproduced the attentional modulations in the empirical data (using the root mean square error, or RMSE). We compared each model's RMSE to a baseline model, which did not simulate any vRF attentional modulations (far left in **Fig 6c**). This null baseline should have the highest error, and any good models should decrease the RMSE between the simulated data and the empirical data. Conversely, a model with higher RMSE is worse at accounting for the empirical data compared to the null model. In both the occipital and parietal ROIs, adding vRF position shifts to the layered model decreased RMSE, while abolishing position shifts generally increased the model error (**Fig 6c**). These data are consistent with the results from the spatial discriminability analysis. Altogether, they suggest that shifts in vRF position have the largest impact on population-level representations, while changes in vRF size or gain play smaller roles in changing the fidelity of the population code.

**DISCUSSION (Max 1500 words; current 1500)**

By simultaneously measuring the response properties of both single voxels and populations of voxels within retinotopic areas of visual cortex, we could link attentional modulations of spatial encoding properties across scales. Our data provide an initial account of how different types of RF modulations improve the quality of population codes for visual space. First, we show how vRF attentional modulations depended on the distance between the vRF's preferred position and the static attention target (**Fig 2**). We then found that shifts in the preferred position of vRFs near the attended target increased the spatial discrimination capacity of a population of voxels (**Fig 3**), as well as the amplitude of stimulus reconstructions based on response patterns across all voxels in a ROI (**Fig 5, 6**).

### **Attentional modulations of spatial RFs**

We provide new data on how vRF responses are modulated around a covertly attended static target (Sprague and Serences, 2013; de Haas et al., 2014; Klein et al., 2014; Kay et al., 2015; Sheremata and Silver, 2015). Like prior macaque studies, we find that vRF position shifts depend on the vRF's distance from the attended target (Connor et al., 1996, 1997). However, we also found that the pattern of attentional modulations differs across the visual hierarchy. In V4, V3A/B, and IPS0 voxels shift towards the attended target, while in earlier areas, vRFs near the attended target are slightly repelled from it (**Fig 2e**). We also found distinct patterns of size modulations: vRF size increased near the attention target in early visual areas, but decreased in parietal areas V3A/B and IPS0. Comparison to the existing literature suggests that patterns of RF size modulations likely depend on the nature of the spatial attention task. In fMRI tasks where subjects attended to the mapping stimulus, rather than a static position, researchers report average vRF size increases with attention (Sprague and Serences, 2013; Kay et al., 2015; Sheremata and Silver, 2015). RFs in macaque area MT shrink when measured with a mapping

probe smaller than the stimulus, but increase in size when macaques track the mapping probes as they move across the screen (Womelsdorf et al., 2006, 2008; Anton-Erxleben et al., 2009; Niebergall et al., 2011). This may be because the RFs shift position to track the probe, causing an apparent increase in overall size. Lastly, manipulating perceptual load at fixation also increases vRF size in human visual cortex (de Haas et al., 2014). Taken together, these observations demonstrate that the pattern of RF response modulations depends both on task demands and on the spatial relationship between the attended target and the encoding unit's RF.

We note that while the similarity between attentional modulations of single cell RFs and single voxel RFs is compelling, their properties are derived from different input signals, and are not interchangeable. fMRI voxels in retinotopically organized regions of visual cortex sample from a broad array of neurons with roughly the same spatial tuning preferences, so a position shift in a vRF could either be driven by a change in the preferred position of single neurons, or by a change in the gain profile across neurons tuned to slightly different locations in the visual field. Similarly, single neuron RFs receive input from smaller RFs in earlier visual areas, and a position shift could arise from either mechanism described above (McAdams and Maunsell, 1999; Baruch and Yeshurun, 2014; Dhruv and Carandini, 2014). Because of this inherent ambiguity when measuring the encoding properties of a locally tuned unit, it is useful to compare them with attentional modulations of population-level representations.

### **Attention boosts the spatial encoding fidelity of a population**

We first measured the overall capacity of a population of voxels to make fine spatial discriminations in a region of space. We found that attention increased spatial discriminability near the attended target, relative to the ignored target. We then performed virtual experiments on the vRFs contributing to the population to determine how they affected the spatial



discriminability metric. We report that vRF position shifts increased spatial discriminability significantly more than vRF size changes or gain changes (**Fig 3**).

Since the spatial discriminability metric (**Fig 3**) is only informative about a local portion of space, we performed a second population analysis to reconstruct an image of the entire visual field on each trial using a multivariate IEM. Attention increased the amplitude of stimulus reconstructions near the attention target, indicating an increase in representational fidelity that accompanied the increase in spatial discriminability. In addition, a layered spatial encoding model revealed that shifts in vRF position could account for these attentional enhancements in the population-level stimulus reconstructions, but changes in vRF size could not. Altogether, our data demonstrate that shifts in position of many RFs may be a dominant way that single encoding units alter the properties of a population spatial code.

Although population-level information increased the most with changes in vRF position, we reiterate that these position changes could arise from spatially-specific patterns of gain modulations in input RFs. If this is true, it is possible that gain modulations with attention may exert their largest effects on the downstream population, where these patterns of gain changes become apparent shifts in vRF position. However, this remains an open question for future work to address.

Our findings also underscore the fact that changes in the spatial encoding properties of single units do not directly translate into analogous changes in the encoding properties of a population of those same units. For example, an overall change in vRF size does not necessarily change the size of the population-level representation (Sprague and Serences, 2013; Kay et al., 2015). Although we found that single units shifted their preferred position towards the attended target, population-level representations did not generally shift with attention. When the

population code did shift its encoded position, we found that it was typically representations of the ignored stimulus that shifted farther from the true stimulus location (**Fig 5**), consistent with more error-prone representations of irrelevant stimuli. These types of differences further emphasize the need to understand the effects of cognitive state on population codes for the entire visual scene, rather than focusing solely on single units.

Lastly, we note that our population-level data do not address the open question of whether RF attentional modulations have perceptual consequences, since it is not clear how the spatial encoding models measured here are linked to visual perception and behavior (Koenderink, 1990; Rose, 1999; Anton-Erxleben and Carrasco, 2013; Klein et al., 2016). Further investigation into these topics should include task manipulations to investigate how attentional modulations of both vRFs and population-level metrics track psychophysical performance.

### **Tuning shifts and labeled lines**

Historically, shifts in the tuning of a RF have not been considered one of the main mechanisms by which attention modulates population-level information, although recent reports suggest that this view is being reconsidered (David et al., 2008; Anton-Erxleben and Carrasco, 2013). This may be due to ‘labeled-line’ theories of visual information processing, which posit that a single neuron has a consistent feature label which downstream neurons rely on to perform computations and transmit stable information (Barlow, 1972; Doetsch, 2000; David et al., 2008). When a spatial RF shifts position as a function of cognitive state (e.g., attention), that single neuron’s feature label is no longer consistent. Without an accompanying shift in the downstream neurons receiving the changing feature label, such a change could disrupt the stability of the population code. However, our results suggest that population-level spatial representations

remain relatively stable – and are even enhanced – when the tuning of the underlying vRFs shift in position, size, and gain.

An alternate proposal to a labeled line code relies on the joint information encoded across a population of cells (Erickson, 1982; Doetsch, 2000). This may occur at several scales—for example, V2 could use the pattern of information from V1 inputs to form a visual representation. This idea is more akin to an encoder-decoder model in which the downstream decoder does not need information about the altered representations in each of the encoder units, but instead relies on a population readout rule (Seriès et al., 2009). The population readout rule could incorporate knowledge about the ‘labels’ of the encoder units, but could perform equally well by relying on relative changes in the pattern across units to resolve the information encoded in the population. However, further exploration of population readout rules in visual cortex are needed to test this hypothesis.

## **Conclusions**

The spatial encoding properties of the visual system can be measured and modeled at many different spatial scales. Here, we report how these properties change with attention for single voxels and for a group of voxels in each ROI. Notably, single vRF modulations do not propagate directly to analogous changes in large-scale codes. Instead, we observed that attentional modulations of vRF position play a dominant role in modulating the amplitude of population-level representations. Future research is needed to resolve how shifts in RF labels are generated, how information is read out from a population, and how these multi-scale attentional modulations affect visual perception and behavior.

## REFERENCES

- Amano K, Wandell B a, Dumoulin SO (2009) Visual field maps, population receptive field sizes, and visual field coverage in the human MT+ complex. *J Neurophysiol* 102:2704–2718.
- Anton-Erxleben K, Carrasco M (2013) Attentional enhancement of spatial resolution: linking behavioural and neurophysiological evidence. *Nat Rev Neurosci* 14:188–200 Available at: <http://www.ncbi.nlm.nih.gov/pubmed/23422910> [Accessed December 19, 2013].
- Anton-Erxleben K, Stephan VM, Treue S (2009) Attention reshapes center-surround receptive field structure in macaque cortical area MT. *Cereb Cortex* 19:2466–2478 Available at: <http://www.pubmedcentral.nih.gov/articlerender.fcgi?artid=2742598&tool=pmcentrez&rendertype=abstract> [Accessed December 19, 2013].
- Barlow HB (1972) Single units and sensation: A neuron doctrine for perceptual psychology? *Perception* 1:371–394.
- Baruch O, Yeshurun Y (2014) Attentional attraction of receptive fields can explain spatial and temporal effects of attention. *Vis cogn* 22:704–736 Available at: <http://www.tandfonline.com/doi/abs/10.1080/13506285.2014.911235>.
- Benjamini Y, Yekutieli D (2001) The control of the false discovery rate in multiple testing under dependency. *Ann Stat* 29:1165–1188.
- Brouwer GJ, Heeger DJ (2009) Decoding and reconstructing color from responses in human visual cortex. *J Neurosci* 29:13992–14003 Available at: <http://www.pubmedcentral.nih.gov/articlerender.fcgi?artid=2799419&tool=pmcentrez&rendertype=abstract> [Accessed January 31, 2014].
- Brouwer GJ, Heeger DJ (2013) Categorical clustering of the neural representation of color. *J Neurosci* 33:15454–15465 Available at:

<http://www.pubmedcentral.nih.gov/articlerender.fcgi?artid=3782623&tool=pmcentrez&rendertype=abstract>.

Butts DA, Goldman MS (2006) Tuning Curves, Neuronal Variability, and Sensory Coding. *PLoS Biol* 4:e92 Available at: <http://biology.plosjournals.org/perlserv/?request=get-document&doi=10.1371%2Fjournal.pbio.0040092>.

Cohen MR, Maunsell JHR (2014) Neuronal mechanisms of spatial attention in visual cerebral cortex. In: *The Oxford Handbook of Attention*, pp 318–345.

Connor CE, Gallant JL, Preddie DC, Van Essen DC (1996) Responses in Area V4 Depend on the Spatial Relationship Between Stimulus and Attention. *J Neurophysiol* 75:1306–1308.

Connor CE, Preddie DC, Gallant JL, Van Essen DC (1997) Spatial attention effects in macaque area V4. *J Neurosci* 17:3201–3214 Available at: <http://www.ncbi.nlm.nih.gov/pubmed/9096154>.

David S V, Hayden BY, Mazer JA, Gallant JL (2008) Attention to stimulus features shifts spectral tuning of V4 neurons during natural vision. *Neuron* 59:509–521 Available at: <http://www.pubmedcentral.nih.gov/articlerender.fcgi?artid=2948549&tool=pmcentrez&rendertype=abstract> [Accessed December 17, 2013].

de Haas B, Schwarzkopf DS, Anderson EJ, Rees G (2014) Perceptual load affects spatial tuning of neuronal populations in human early visual cortex. *Curr Biol* 24:R66–R67 Available at: <http://linkinghub.elsevier.com/retrieve/pii/S0960982213015169> [Accessed January 20, 2014].

Desimone R, Duncan J (1995) Neural mechanisms of selective visual attention. *Annu Rev Neurosci* 18:193–222.

Dhruv NT, Carandini M (2014) Cascaded Effects of Spatial Adaptation in the Early Visual

System. *Neuron* 81:529–535 Available at: <http://dx.doi.org/10.1016/j.neuron.2013.11.025>.

Doetsch GS (2000) Patterns in the brain. Neuronal population coding in the somatosensory system. *Physiol Behav* 69:187–201 Available at: <http://www.ncbi.nlm.nih.gov/pubmed/10854929>.

Dumoulin SO, Wandell BA (2008) Population receptive field estimates in human visual cortex. *Neuroimage* 39:647–660 Available at: <http://www.pubmedcentral.nih.gov/articlerender.fcgi?artid=3073038&tool=pmcentrez&rendertype=abstract> [Accessed December 16, 2013].

Erickson RP (1982) The across-fiber pattern theory: An organizing principle for molar neural function. In: *Contributions to sensory physiology*, Vol. 6, pp 79–110.

Ester EF, Anderson DE, Serences JT, Awh E (2013) A Neural Measure of Precision in Visual Working Memory. *J Cogn Neurosci* 25:754–761.

Ester EF, Sprague TC, Serences JT (2015) Parietal and Frontal Cortex Encode Stimulus-Specific Mnemonic Representations during Visual Working Memory. *Neuron* 87:893–905 Available at: <http://dx.doi.org/10.1016/j.neuron.2015.07.013>.

Gattass R, Nascimento-Silva S, Soares JGM, Lima B, Jansen AK, Diogo ACM, Farias MF, Botelho MMEP, Mariani OS, Azzi J, Fiorani M (2005) Cortical visual areas in monkeys: location, topography, connections, columns, plasticity and cortical dynamics. *Philos Trans R Soc Lond B Biol Sci* 360:709–731.

Harvey BM, Dumoulin SO (2011) The relationship between cortical magnification factor and population receptive field size in human visual cortex: constancies in cortical architecture. *J Neurosci* 31:13604–13612 Available at: <http://www.ncbi.nlm.nih.gov/pubmed/21940451> [Accessed January 2, 2014].

- Hoerl AE, Kennard RW (1970) Ridge Regression: Biased Estimation for Nonorthogonal Problems. *Technometrics* 12:55–67.
- Huth AG, Nishimoto S, Vu AT, Gallant JL (2012) A continuous semantic space describes the representation of thousands of object and action categories across the human brain. *Neuron* 76:1210–1224.
- Kay KN, Weiner KS, Grill-Spector K (2015) Attention reduces spatial uncertainty in human ventral temporal cortex. *Curr Biol* 25:595–600 Available at: <http://linkinghub.elsevier.com/retrieve/pii/S0960982214016534>.
- Klein BP, Harvey BM, Dumoulin SO (2014) Attraction of Position Preference by Spatial Attention throughout Human Visual Cortex. *Neuron*:1–11 Available at: <http://linkinghub.elsevier.com/retrieve/pii/S089662731400748X> [Accessed September 18, 2014].
- Klein BP, Paffen CLE, Pas SF, Dumoulin SO (2016) Predicting bias in perceived position using attention field models. *J Vis* 16:1–15.
- Koenderink JJ (1990) The brain a geometry engine. *Psychol Res* 52:122–127.
- Lee S, Papanikolaou A, Logothetis NK, Smirnakis SM, Keliris G a (2013) A new method for estimating population receptive field topography in visual cortex. *Neuroimage* 81:144–157 Available at: <http://www.ncbi.nlm.nih.gov/pubmed/23684878> [Accessed February 6, 2014].
- Ma WJ, Beck JM, Latham PE, Pouget A (2006) Bayesian inference with probabilistic population codes. *Nat Neurosci* 9:1432–1438 Available at: <http://www.ncbi.nlm.nih.gov/pubmed/17057707> [Accessed February 28, 2013].
- McAdams CJ, Maunsell JHR (1999) Effects of attention on orientation-tuning functions of single neurons in macaque cortical area V4. *J Neurosci* 19:431–441 Available at:

<http://www.ncbi.nlm.nih.gov/pubmed/9870971>.

Moran J, Desimone R (1985) Selective attention gates visual processing in the extrastriate cortex. *Science* (80- ) 229:782–784.

Navalpakkam V, Itti L (2007) Search Goal Tunes Visual Features Optimally. *Neuron* 53:605–617.

Niebergall R, Khayat PS, Treue S, Martinez-Trujillo JC (2011) Expansion of MT neurons excitatory receptive fields during covert attentive tracking. *J Neurosci* 31:15499–15510 Available at: <http://www.ncbi.nlm.nih.gov/pubmed/22031896> [Accessed December 19, 2013].

Pouget A, Dayan P, Zemel RS (2003) Inference and computation with population codes. *Annu Rev Neurosci* 26:381–410 Available at: <http://www.annualreviews.org/doi/abs/10.1146/annurev.neuro.26.041002.131112>.

Regan D, Beverley KI (1985) Postadaptation orientation discrimination. *J Opt Soc Am* 2:147–155.

Roberts M, Delicato LS, Herrero J, Gieselmann M a, Thiele A (2007) Attention alters spatial integration in macaque V1 in an eccentricity-dependent manner. *Nat Neurosci* 10:1483–1491.

Rose D (1999) The historical roots of the theories of local signs and labelled lines. *Perception* 28:675–685.

Scolari M, Serences JT (2009) Adaptive Allocation of Attentional Gain. *J Neurosci* 29:11933–11942 Available at: <http://www.jneurosci.org/cgi/doi/10.1523/JNEUROSCI.5642-08.2009>.

Scolari M, Serences JT (2010) Basing perceptual decisions on the most informative sensory neurons. *J Neurophysiol* 104:2266–2273.



Serences JT, Saproo S (2012) Computational advances towards linking BOLD and behavior.

*Neuropsychologia* 50:435–446 Available at:

<http://www.pubmedcentral.nih.gov/articlerender.fcgi?artid=3384549&tool=pmcentrez&rendertype=abstract> [Accessed January 30, 2014].

Seriès P, Stocker A a, Simoncelli EP (2009) Is the homunculus “aware” of sensory adaptation?

*Neural Comput* 21:3271–3304.

Sheremata SL, Silver MA (2015) Hemisphere-Dependent Attentional Modulation of Human

Parietal Visual Field Representations. *J Neurosci* 35:508–517 Available at:

<http://www.jneurosci.org/cgi/doi/10.1523/JNEUROSCI.2378-14.2015> [Accessed January 14, 2015].

Sprague TC, Ester EF, Serences JT (2014) Reconstructions of information in visual spatial

working memory degrade with memory load. *Curr Biol* 24:2174–2180 Available at:

<http://www.ncbi.nlm.nih.gov/pubmed/25201683> [Accessed January 6, 2015].

Sprague TC, Ester EF, Serences JT (2016) Restoring Latent Visual Working Memory

Representations in Human Cortex. *Neuron* 91:694–707 Available at:

<http://linkinghub.elsevier.com/retrieve/pii/S089662731630352X>.

Sprague TC, Saproo S, Serences JT (2015) Visual attention mitigates information loss in small-

and large-scale neural codes. *Trends Cogn Sci*:1–12 Available at:

<http://linkinghub.elsevier.com/retrieve/pii/S1364661315000297>.

Sprague TC, Serences JT (2013) Attention modulates spatial priority maps in the human

occipital, parietal and frontal cortices. *Nat Neurosci* 16:1879–1887 Available at:

<http://www.ncbi.nlm.nih.gov/pubmed/24212672> [Accessed December 11, 2013].

Tolias AS, Moore T, Smirnakis SM, Tehovnik EJ, Siapas AG, Schiller PH (2001) Eye

movements modulate visual receptive fields of V4 neurons. *Neuron* 29:757–767.

Wandell BA, Winawer J (2015) Computational neuroimaging and population receptive fields.

*Trends Cogn Sci*:1–9 Available at: <http://dx.doi.org/10.1016/j.tics.2015.03.009>.

Womelsdorf T, Anton-Erxleben K, Pieper F, Treue S (2006) Dynamic shifts of visual receptive

fields in cortical area MT by spatial attention. *Nat Neurosci* 9:1156–1160 Available at:

<http://www.ncbi.nlm.nih.gov/pubmed/16906153> [Accessed December 16, 2013].

Womelsdorf T, Anton-Erxleben K, Treue S (2008) Receptive field shift and shrinkage in

macaque middle temporal area through attentional gain modulation. *J Neurosci* 28:8934–

8944 Available at: <http://www.ncbi.nlm.nih.gov/pubmed/18768687> [Accessed December

16, 2013].

Zirnsak M, Steinmetz N a, Noudoost B, Xu KZ, Moore T (2014) Visual space is compressed in

prefrontal cortex before eye movements. *Nature* 507:504–507 Available at:

<http://www.ncbi.nlm.nih.gov/pubmed/24670771> [Accessed May 23, 2014].

## TABLES

**Table 1.** vRF selection statistics, pooled across participants (N = 7)

| Region of interest | Total no. of localized voxels | No. of voxels after GLM thresholding | No. of voxels after regularizability threshold | No. of voxels after cross-validation threshold | No. of voxels after removing difference score outliers | Percent that survive all thresholds | RMSE fit error for surviving voxels |
|--------------------|-------------------------------|--------------------------------------|------------------------------------------------|------------------------------------------------|--------------------------------------------------------|-------------------------------------|-------------------------------------|
| V1                 | 3,723                         | 3,540                                | 2,438                                          | 989                                            | 931                                                    | 25.01%                              | 0.1105                              |
| V2                 | 4,154                         | 3,970                                | 3,115                                          | 1,405                                          | 1,339                                                  | 32.23%                              | 0.1087                              |
| V3                 | 3,698                         | 3,519                                | 2,839                                          | 1,520                                          | 1,435                                                  | 38.81%                              | 0.0994                              |
| V4                 | 1,702                         | 1,492                                | 1,118                                          | 361                                            | 336                                                    | 19.74%                              | 0.0783                              |
| V3A/B              | 1,988                         | 1,922                                | 1,440                                          | 443                                            | 416                                                    | 20.93%                              | 0.0893                              |
| IPS0               | 1,567                         | 1,492                                | 800                                            | 114                                            | 110                                                    | 7.02%                               | 0.0882                              |
| V1 – V4            | 13,277                        | 12,521                               | 9,510                                          | 4,275                                          | 4,041                                                  | 30.44%                              | 0.1032                              |
| V3A/B & IPS0       | 3,555                         | 3,414                                | 2,240                                          | 557                                            | 526                                                    | 14.80%                              | 0.0894                              |
| TOTAL              | 16,832                        | 15,935                               | 11,750                                         | 4,832                                          | 4,567                                                  | 27.13%                              | 0.1016                              |

**Table 2.** Mean coefficients for polynomial fits of how vRF parameter change is modulated by distance from the attended location ( $v\_dist\_attn$ )

|       | Position          | Size               | Amplitude         | Baseline          |
|-------|-------------------|--------------------|-------------------|-------------------|
| V1    | -.069, .095       | -.064              | -.019, .137, .135 | .011, -.073, .010 |
| V2    | .015, -.133, .082 | -.064, .160        | -.016, .125, .046 | .011, -.066, .061 |
| V3    | .017, -.135, .033 | -.073, .163        | -.025, .170, .032 | .009, -.053, .054 |
| V4    | -.162             | -.181              | .308              | .011, -.078, .085 |
| V3A/B | -.318             | -.091, .461, -.520 | .210              | <.001             |
| IPSO  | -.425             | -.445              | -.076, .495       | .073              |

<sup>a</sup> Number of reported coefficients in the table correspond to the polynomial order which was yielded the most parsimonious fit to the data (e.g., 1 coefficient for  $n = 0$ , 2 coefficients for  $n = 1$ , etc.).

**Table 3.** 2-way ANOVA results for reconstruction parameter changes (*s\_dist\_attn* x attention hemifield).

|                                     | V1              | V2              | V3              | V4              | V3A/B           | IPS0            | V1 – V4         | V3A/B & IPS0    |
|-------------------------------------|-----------------|-----------------|-----------------|-----------------|-----------------|-----------------|-----------------|-----------------|
| Omnibus test                        |                 |                 |                 |                 |                 |                 |                 |                 |
| Position                            | <b>&lt;.001</b> | <b>&lt;.001</b> | <b>&lt;.001</b> | <b>&lt;.001</b> | <b>&lt;.001</b> | <b>.001</b>     | <b>&lt;.001</b> | <b>&lt;.001</b> |
| Size                                | .216            | .565            | .019            | .428            | <b>.006</b>     | .121            | <b>.001</b>     | .110            |
| Amplitude                           | .174            | .579            | <b>.024</b>     | <b>&lt;.001</b> | <b>&lt;.001</b> | <b>.008</b>     | <b>.016</b>     | <b>&lt;.001</b> |
| Baseline                            | .088            | .734            | .934            | <b>&lt;.001</b> | <b>.001</b>     | .937            | <b>.015</b>     | .241            |
| Main effect of distance             |                 |                 |                 |                 |                 |                 |                 |                 |
| Position                            | <b>&lt;.001</b> | <b>&lt;.001</b> | <b>&lt;.001</b> | <b>&lt;.001</b> | <b>&lt;.001</b> | .192            | <b>&lt;.001</b> | <b>&lt;.001</b> |
| Size                                |                 |                 |                 |                 | .484            |                 | <b>.019</b>     |                 |
| Amplitude                           |                 |                 | .140            | <b>.002</b>     | <b>.005</b>     | .478            | .100            | <b>.002</b>     |
| Baseline                            |                 |                 |                 | .829            | .916            |                 | .210            |                 |
| Main effect of attention            |                 |                 |                 |                 |                 |                 |                 |                 |
| Position                            | .371            | .916            | .346            | .067            | <b>.005</b>     | .254            | .401            | .343            |
| Size                                |                 |                 |                 |                 | <b>.003</b>     |                 | <b>.005</b>     |                 |
| Amplitude                           |                 |                 | .069            | <b>&lt;.001</b> | <b>.005</b>     | .158            | <b>.049</b>     | .004            |
| Baseline                            |                 |                 |                 | <b>.001</b>     | <b>&lt;.001</b> |                 | <b>.004</b>     |                 |
| Interaction of distance & attention |                 |                 |                 |                 |                 |                 |                 |                 |
| Position                            | .052            | .588            | .541            | .657            | <b>&lt;.001</b> | <b>&lt;.001</b> | .121            | .026            |
| Size                                |                 |                 |                 |                 | .077            |                 | .271            |                 |
| Amplitude                           |                 |                 | .064            | <b>&lt;.001</b> | <b>&lt;.001</b> | <b>.004</b>     | .224            | <b>&lt;.001</b> |
| Baseline                            |                 |                 |                 | .019            | .011            |                 | .370            |                 |

<sup>a</sup> **bold** numbers indicate that the p-value passed FDR-correction (q = .05, corrected across ROIs and comparisons within each parameter).

**Table 4.** RMSE (and 95% CIs) between reconstructions from the reduced dataset (only using voxels with RFs) or from different versions of the layered IEM using the same voxels.

|                                | <b>Reduced data</b>     | <b>p/s/a/b</b>          | <b>p/a/b</b>            | <b>p/s/b</b>            | <b>s/a/b</b>            | <b>p/a</b>              | <b>s/a</b>              | <b>p/s</b>              | <b>p</b>                | <b>a</b>                | <b>s</b>                | <b>none</b>             |
|--------------------------------|-------------------------|-------------------------|-------------------------|-------------------------|-------------------------|-------------------------|-------------------------|-------------------------|-------------------------|-------------------------|-------------------------|-------------------------|
| Combined occipital V1 – V4     | 0.133<br>[0.109, 0.170] | 0.146<br>[0.146, 0.146] | 0.148<br>[0.147, 0.148] | 0.142<br>[0.141, 0.143] | 0.194<br>[0.194, 0.194] | 0.148<br>[0.148, 0.148] | 0.194<br>[0.194, 0.194] | 0.141<br>[0.141, 0.141] | 0.143<br>[0.143, 0.143] | 0.194<br>[0.194, 0.194] | 0.194<br>[0.194, 0.194] | 0.193<br>[0.193, 0.193] |
| Combined parietal V3A/B & IPS0 | 0.834<br>[0.744, 0.959] | 0.415<br>[0.410, 0.419] | 0.426<br>[0.422, 0.431] | 0.411<br>[0.407, 0.416] | 0.443<br>[0.439, 0.447] | 0.425<br>[0.421, 0.430] | 0.451<br>[0.447, 0.456] | 0.410<br>[0.405, 0.416] | 0.410<br>[0.406, 0.414] | 0.441<br>[0.437, 0.445] | 0.447<br>[0.442, 0.452] | 0.834<br>[0.744, 0.959] |

<sup>a</sup> To generate CIs, the resampling of the real data is performed at the level of the fits to the reconstructions, whereas resampling layered IEM RMSEs is described in **Materials and Methods**

## SUPPLEMENTAL INFORMATION

### **Spatial tuning shifts increase the discriminability and fidelity of population codes in visual cortex**

Running title: Spatial attention from units to populations

Vy A. Vo<sup>1\*</sup>, Thomas C. Sprague<sup>1,2</sup>, John T. Serences<sup>1,3,4\*</sup>

<sup>1</sup>Neurosciences Graduate Program, University of California, San Diego, La Jolla, CA 92093

<sup>2</sup>Department of Psychology and Center for Neural Science, New York University, New York, New York 10003

<sup>3</sup>Department of Psychology, University of California, San Diego, La Jolla, CA 92093

<sup>4</sup>Kavli Institute for Brain and Mind, University of California, San Diego, La Jolla, CA 92093

#### **\*Correspondence:**

Neurosciences Graduate Program

University of California, San Diego

La Jolla, CA 92093-0634

[vyaiivo@ucsd.edu](mailto:vyaiivo@ucsd.edu) or [jserences@ucsd.edu](mailto:jserences@ucsd.edu)

## SUPPLEMENTAL METHODS

### Raw data and analysis code

All the data and analysis code needed to reproduce the analyses in this text are available in an Open Science Framework repository at <https://osf.io/s9vqv/>.

### Population analysis (3): Layered spatial encoding model in smaller retinotopic ROIs

In the main text, we merge several retinotopically-defined ROIs to form a large occipital and parietal region before estimating the layered encoding model. When we attempted to estimate a layered IEM for the smaller ROIs, we were forced to exclude several participants because they did not have enough voxels in that region to calculate a stable population-level estimate of the spatial information in the mapped region. That is, the weight matrix estimated in the training portion of the IEM was poorly conditioned, or not full rank (**Eq. 4**). This resulted in the exclusion of 16 out of 42 possible participant-ROI pairs: V1 (AL); V3 (AL); V3A/B (AL, AP, AR, AU); V4 (AA, AL, AR, AU); IPS0 (AA, AL, AP, AR, AT, AU).

Note that the chosen level of noise did not qualitatively impact the results. For example, rather than just adding Gaussian noise, we also created a noise model that followed the covariance structure between all voxels in each ROI. To estimate the covariance matrix, we computed the residuals between the true trial-wise beta weights and the predicted trial-wise beta weights for each voxel based on its vRF model. We then calculated the pairwise covariance between the residuals for each set of voxels. Last, we added noise that followed this covariance structure to each voxel's channel weights and simulated BOLD response. This noise was scaled to be the same as the noise level that most accurately captured the real reconstruction data (i.e., mean noise is 0.5 standard units). The pattern of results between each of the model manipulations remained the same, so those results are not discussed here.





## SUPPLEMENTAL TABLES AND FIGURES

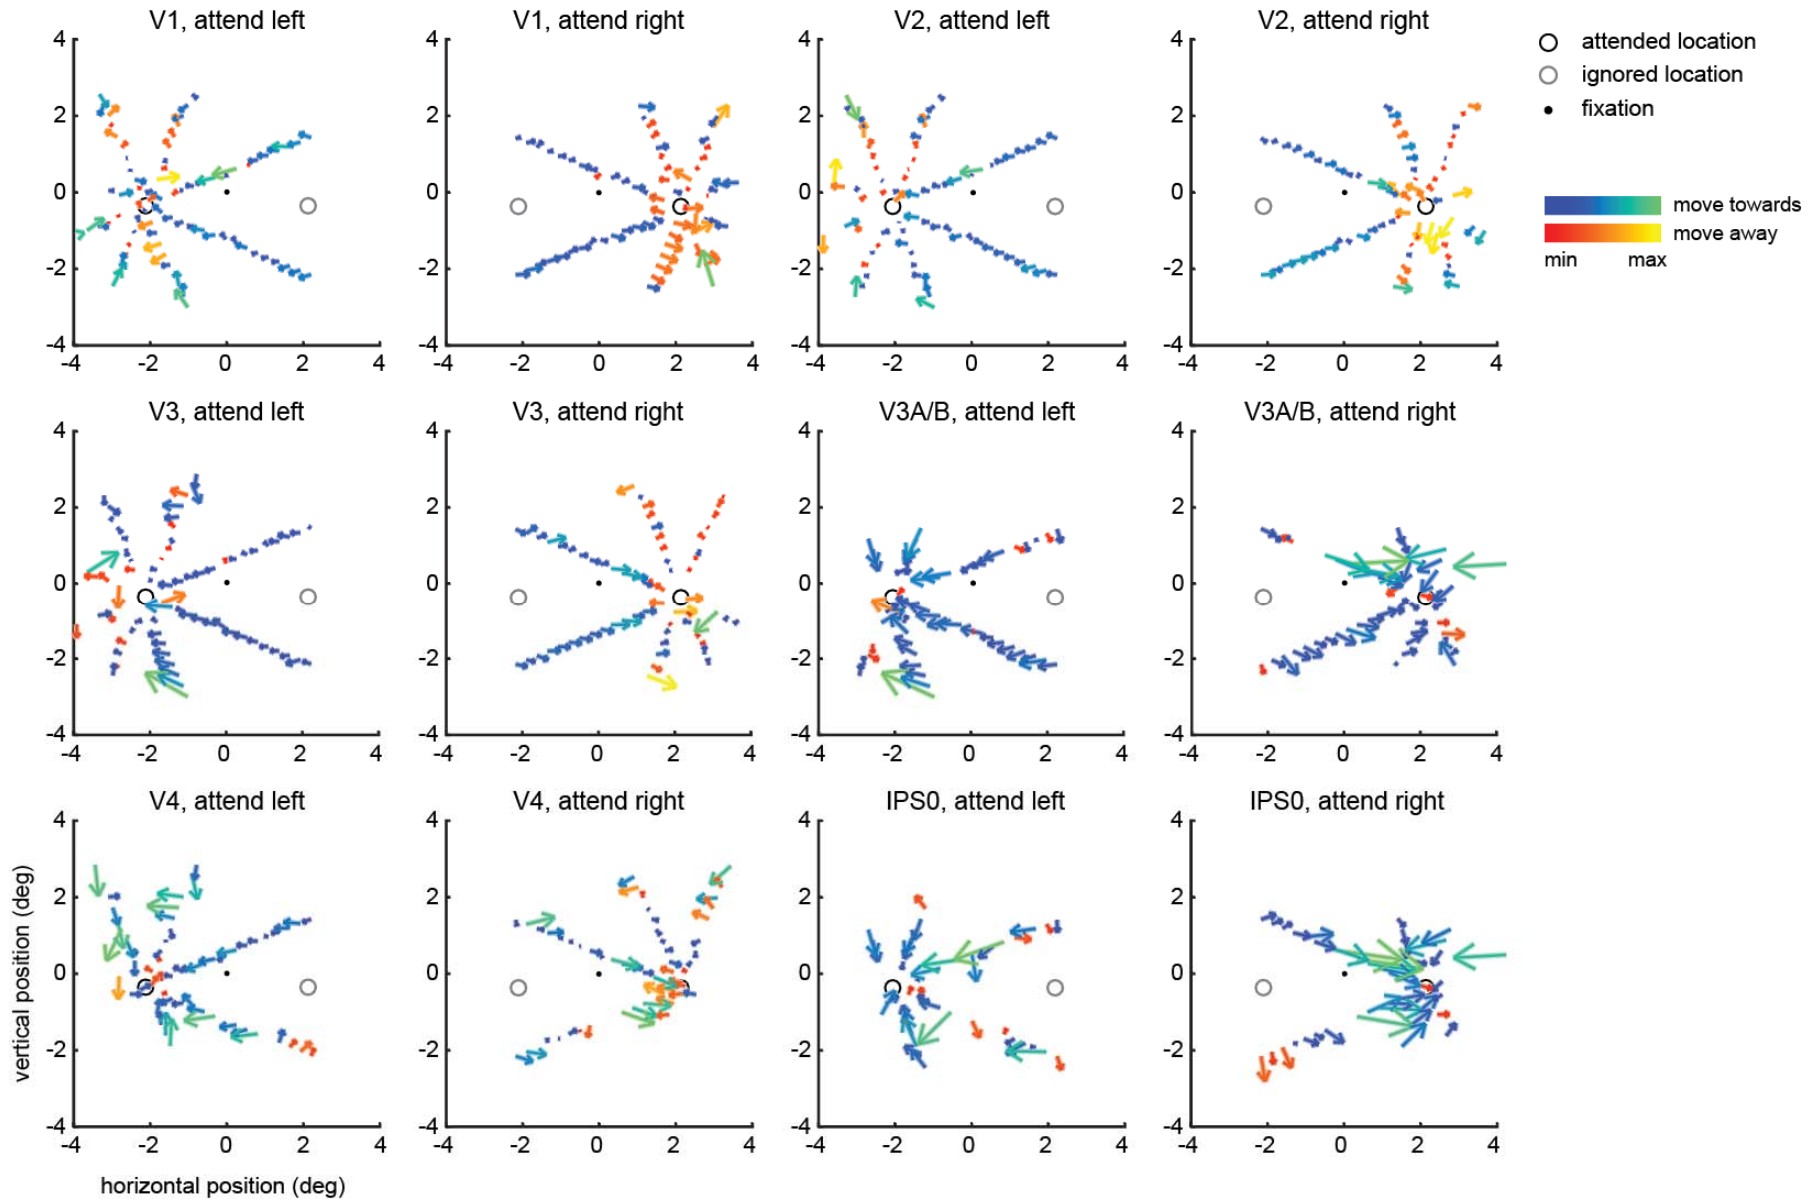

**Figure S1.** Preferred position changes of vRFs from each mapped visual area for both attention conditions. Like Figure 2c, these plots show participant averages. The majority of vRFs shift toward the attended location.

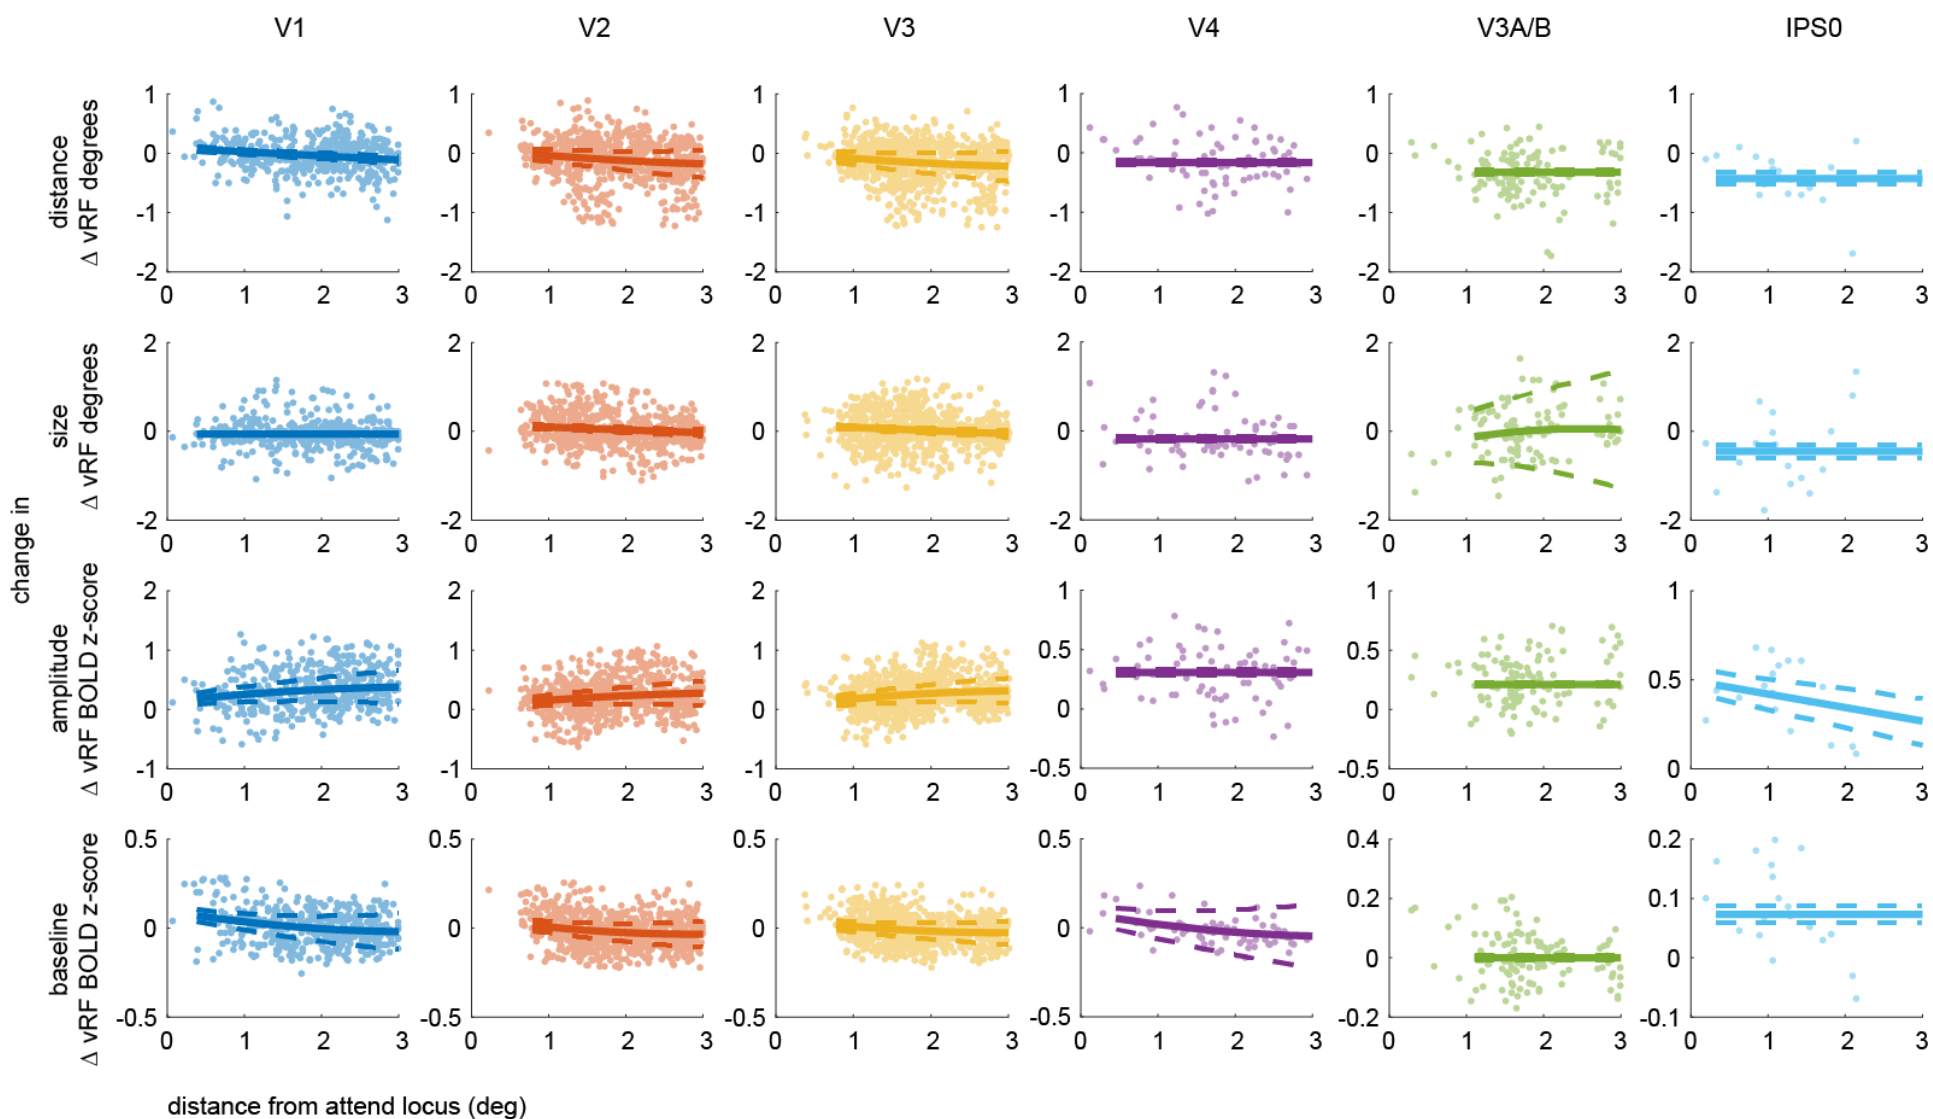

**Figure S2.** Related to **Table 2**. vRF attentional modulations as a function of distance from the attend location. All vRFs across participants are plotted here, overlaid with the best bootstrapped polynomial fit for every VOI-parameter pair.

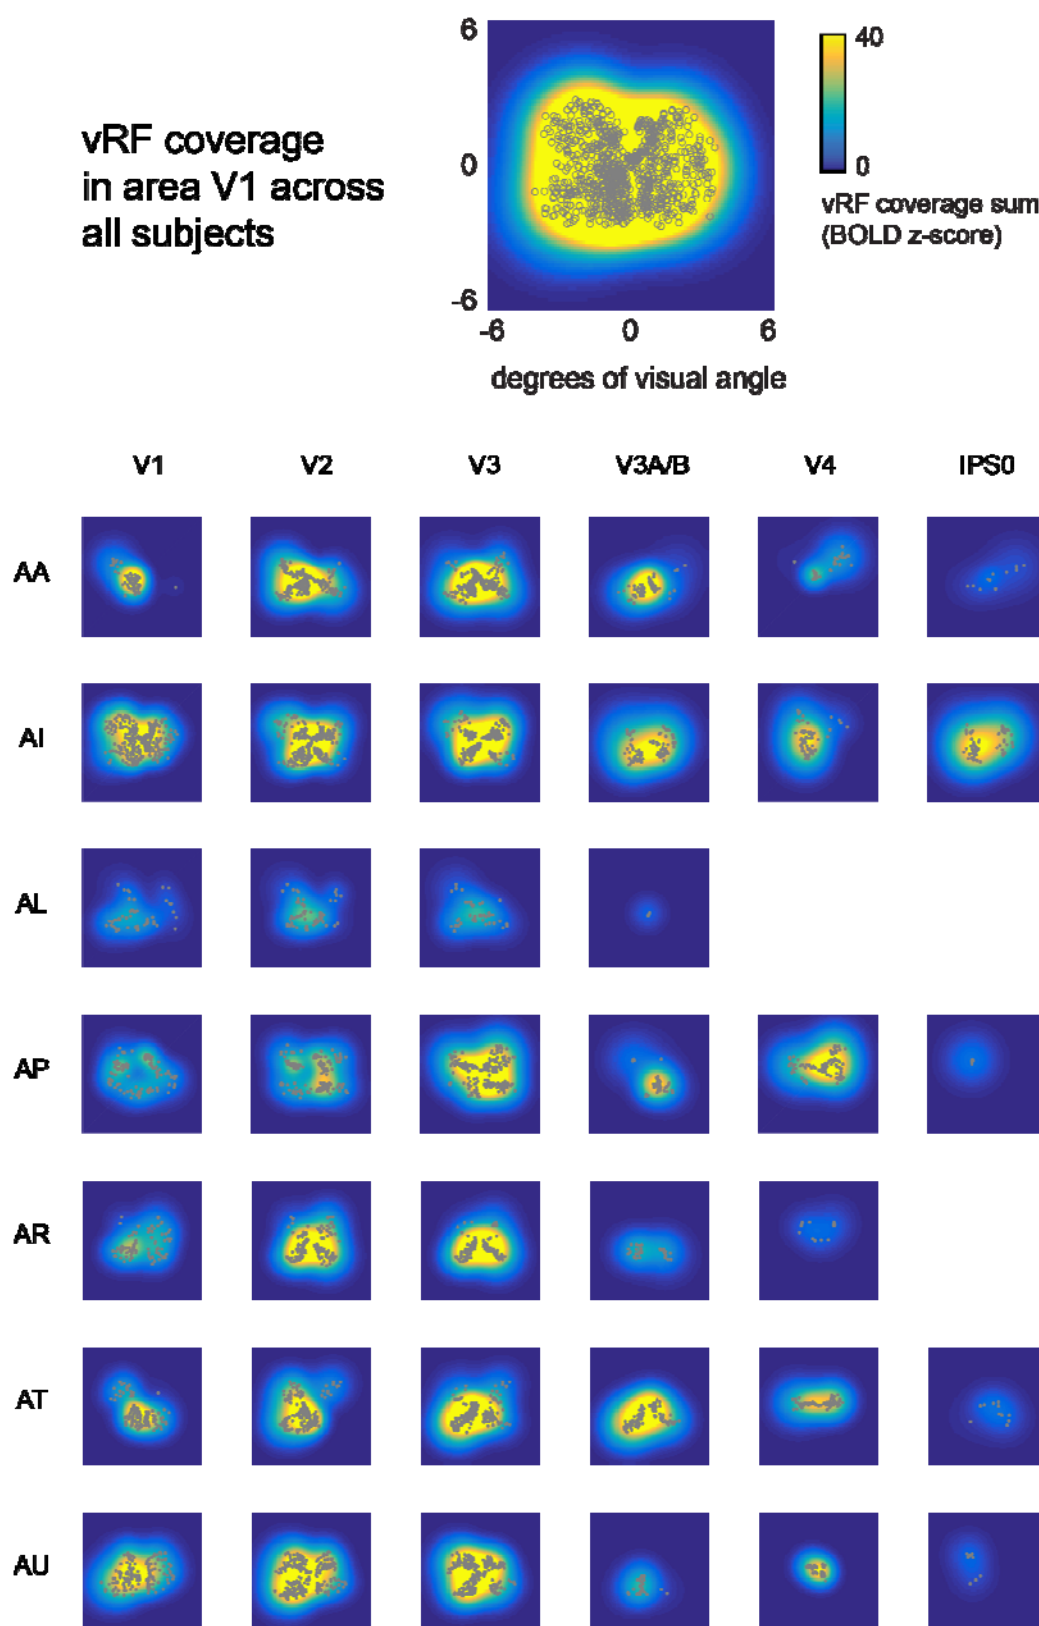

**Figure S3.** A plot of the visual field coverage of all ROIs and all participants for vRFs mapped during the attend fixation runs. Top map shows the combined coverage across all participants in area V1. All images are plotted on the same colorscale and only account for fit centers and sizes (e.g., no scaling by fit amplitude and baseline). Empty cells indicate that no voxels from that participant-ROI pair survived the voxel thresholding procedure.

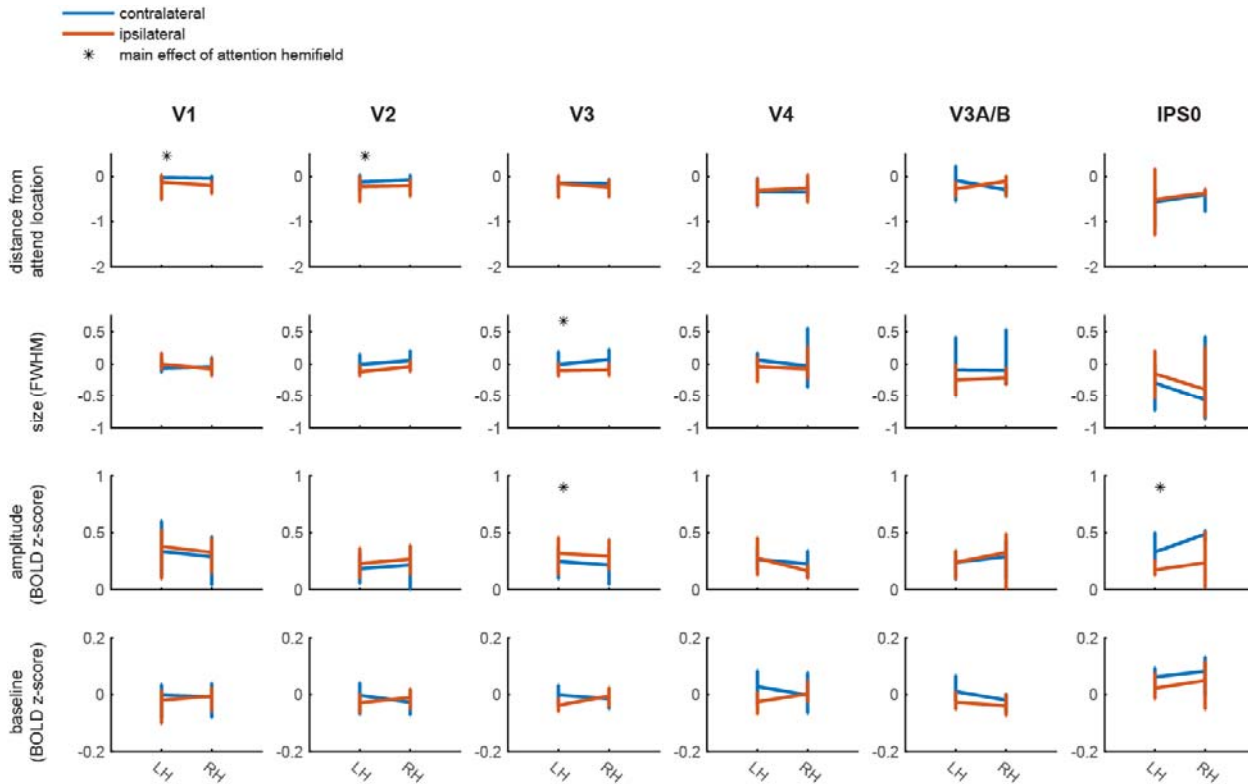

**Figure S4.** vRF attentional modulations by visual hemifield and voxel hemisphere. An asterisk indicates a main effect of attended visual hemifield (see **Table S3** for p-values). Areas with a significant difference in contralateral vs. ipsilateral difference scores are the same regions which have large slopes in **Fig S2**. This simply reflects the fact that voxels near the attended location are always contralateral (e.g., voxels in the RH will code for locations near the attention target in the left, or contralateral, hemifield). There was no main effect of voxel hemisphere or an interaction of the two factors.

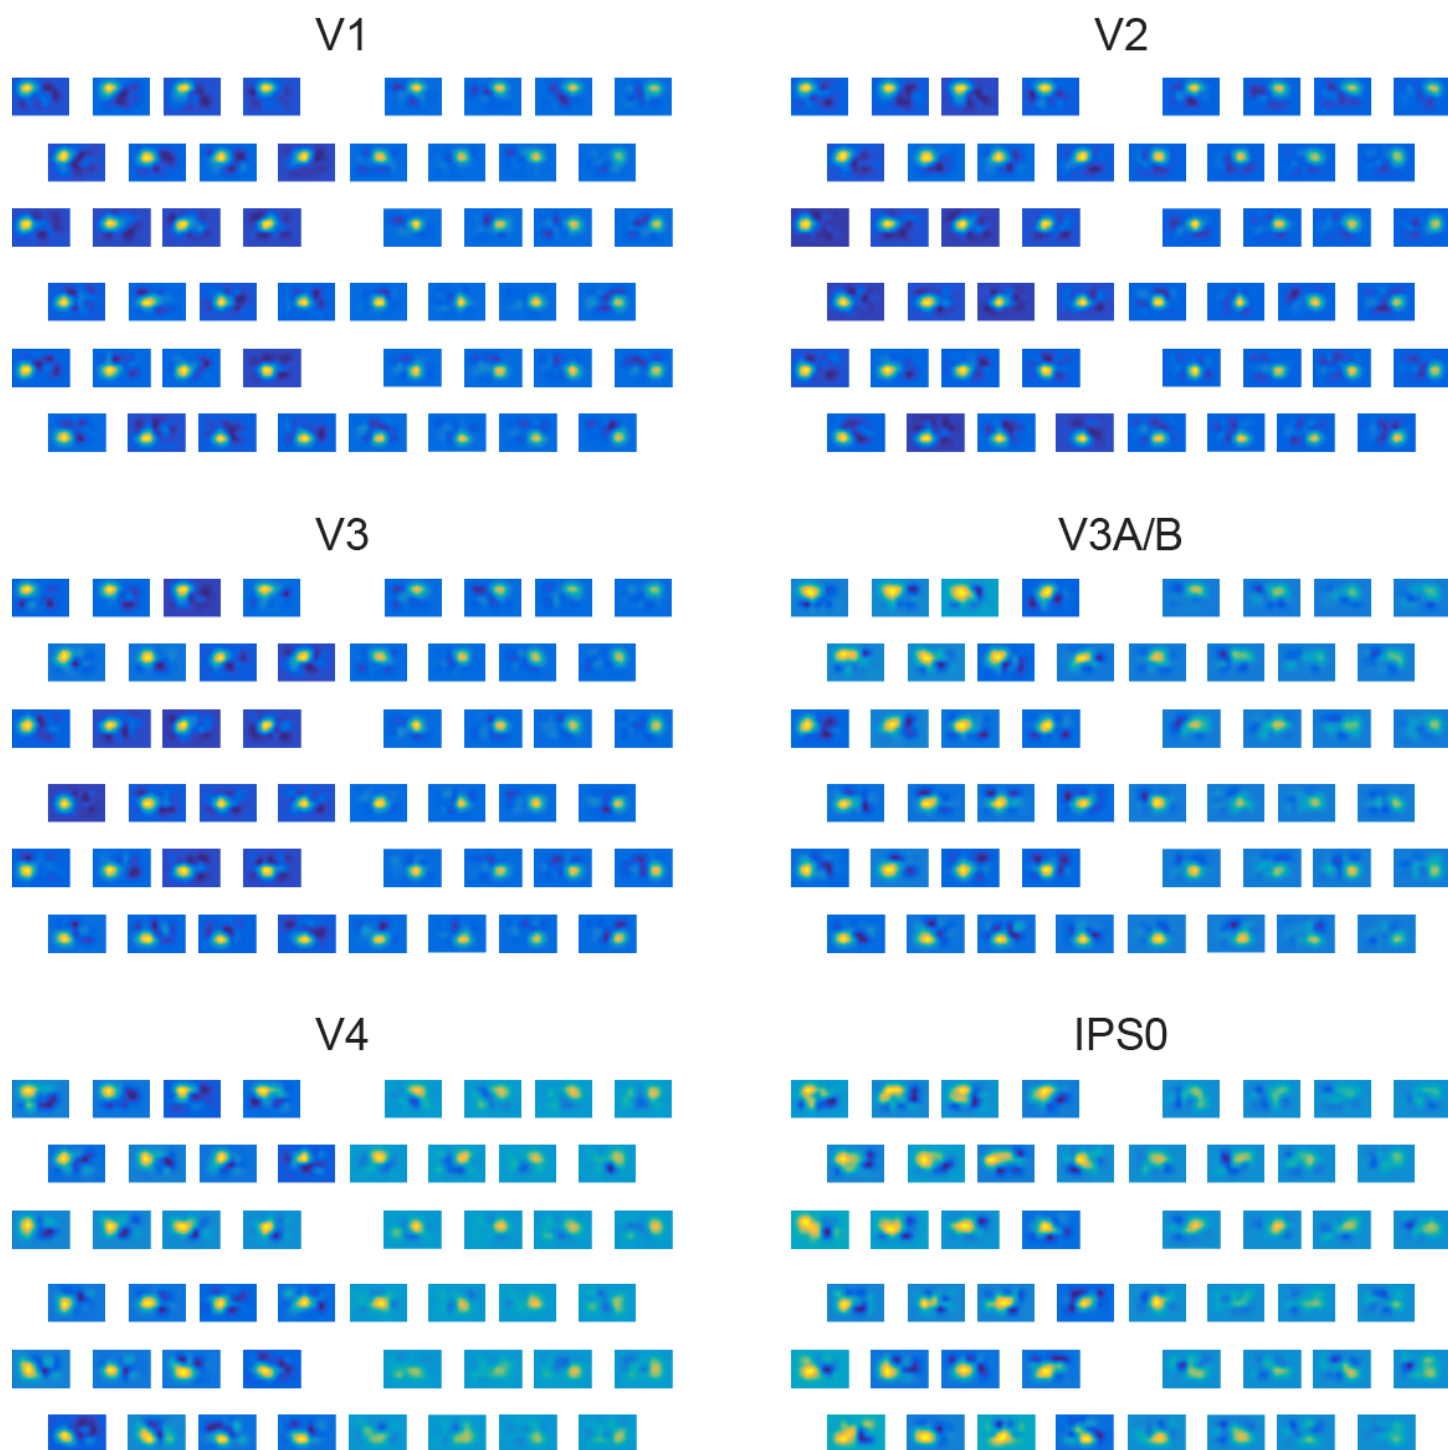

**Figure S5.** Stimulus reconstructions for each ROI, averaged across participants, and like positions across condition. Colorscale is constant across all 48 stimulus positions within an ROI. (Reconstructions for the attend right condition were flipped and averaged with the attend left condition.) The left hemifield is attended and the right hemifield is ignored. Stimuli that fall along the horizontal midline are excluded here.

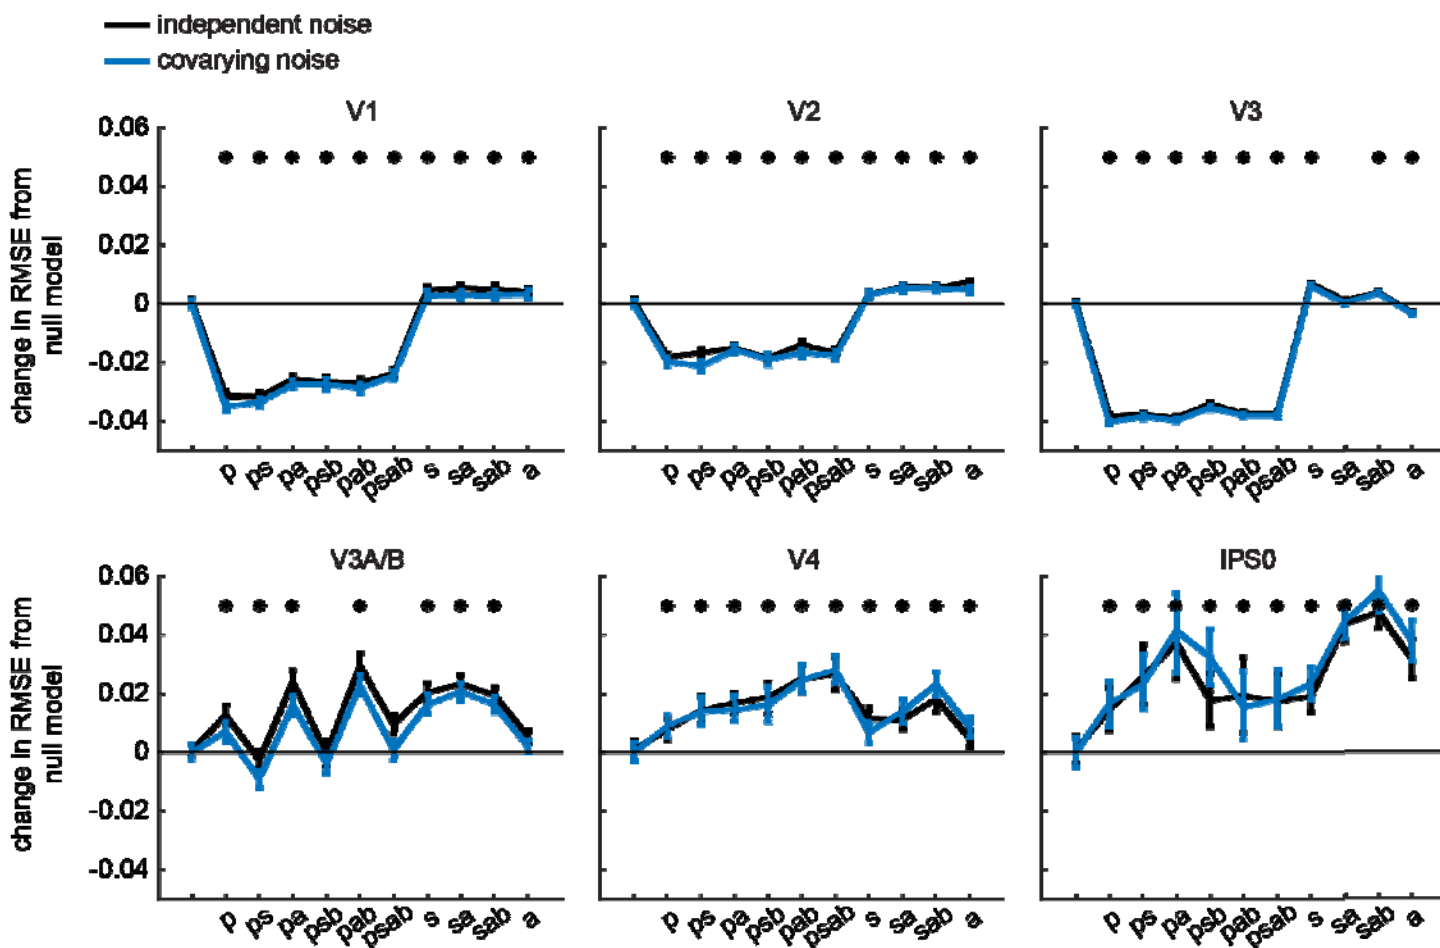

**Figure S6.** The level of noise added to the generated voxel responses was systematically manipulated (see **Supplemental Methods**). We then tested whether the noise parameters affected which model best explained the attentional modulations observed in the stimulus reconstructions. Shown on the x axis is which of the 4 vRF parameters was allowed to vary between attention conditions. The pattern of results was the same across models which used independent noise in the BOLD data simulation or noise which scaled with the voxelwise covariance matrix.

**Table S1.** Mean parameters (and 95% CIs) fit to vRF size data as a function of visual eccentricity

|       | Baseline        | Slope             |
|-------|-----------------|-------------------|
| V1    | .49 [.46, .53]  | 1.34 [1.30, 1.39] |
| V2    | .41 [.36, .47]  | 1.60 [1.53, 1.69] |
| V3    | .43 [.39, .47]  | 1.86 [1.81, 1.92] |
| V4    | .76 [.67, .85]  | 1.84 [1.72, 1.95] |
| V3A/B | .55 [.46, .63]  | 2.20 [2.10, 2.29] |
| IPSO  | .92 [.69, 1.18] | 2.22 [1.78, 2.58] |



**Table S2.** Overall changes in vRF parameters with attention (attend left or right – attend fixation)

|           | V1                   | V2                   | V3                   | V4                   | V3A/B                | IPS0                 |
|-----------|----------------------|----------------------|----------------------|----------------------|----------------------|----------------------|
| Position  | -.108 [-.228, -.041] | -.147 [-.363, -.017] | -.182 [-.349, -.062] | -.193 [-.422, -.070] | -.303 [-.511, -.101] | -.497 [-.846, -.289] |
| Size      | -.052 [-.123, .089]  | -.008 [-.109, .105]  | -.024 [-.152, .103]  | -.168 [-.262, .023]  | -.037 [-.185, .233]  | -.403 [-.534, -.049] |
| Amplitude | .315 [.097, .450]    | .234 [.077, .361]    | .262 [.131, .382]    | .281 [.129, .399]    | .218 [.153, .304]    | .313 [.239, .397]    |
| Baseline  | -.008 [-.070, .029]  | -.019 [-.060, .016]  | -.013 [-.043, .016]  | -.019 [-.040, .007]  | -.001 [-.040, .048]  | .058 [-.012, .096]   |

<sup>a</sup> Bracketed numbers represent bootstrapped 95% CIs.

**Table S3.** Exact p-values for the permuted tests of vRF modulations by voxel hemisphere and attention hemifield, associated with **Fig S4**.

|                                       | V1          | V2          | V3              | V4   | V3A/B | IPSO        |
|---------------------------------------|-------------|-------------|-----------------|------|-------|-------------|
| Main effect of attention hemifield    |             |             |                 |      |       |             |
| Position                              | <b>.007</b> | <b>.009</b> | .397            | .491 | .548  | .824        |
| Size                                  | .884        | .081        | <b>.002</b>     | .145 | .505  | .056        |
| Amplitude                             | .055        | .093        | <b>&lt;.001</b> | .274 | .330  | <b>.005</b> |
| Baseline                              | .727        | .642        | .800            | .118 | .397  | .014        |
| Main effect of voxel hemisphere       |             |             |                 |      |       |             |
| Position                              | .435        | .702        | .572            | .756 | .770  | .648        |
| Size                                  | .586        | .023        | .320            | .980 | .640  | .569        |
| Amplitude                             | .513        | .534        | .672            | .212 | .263  | .187        |
| Baseline                              | .715        | .892        | .385            | .129 | .813  | .187        |
| Interaction of hemisphere & hemifield |             |             |                 |      |       |             |
| Position                              | .602        | .752        | .472            | .186 | .770  | .684        |
| Size                                  | .103        | .726        | .476            | .654 | .874  | .571        |
| Amplitude                             | .710        | .965        | .887            | .367 | .699  | .275        |
| Baseline                              | .125        | .073        | .049            | .685 | .056  | .618        |

<sup>a</sup> **bold** numbers indicate that the p-value passed FDR-correction ( $q = .05$ , corrected across ROIs and comparisons within each parameter).

**Table S4.** Model RMSE (and 95% CIs) between reconstructions from the reduced dataset (only using voxels with RFs) or from different versions of the layered IEM using the same voxels in the smaller retinotopic regions (compare to Figure S6).

|       | <b>Real data</b>        | <b>p/s/a/b</b>          | <b>p/a/b</b>            | <b>p/s/b</b>            | <b>s/a/b</b>            | <b>p/a</b>              | <b>s/a</b>              | <b>p/s</b>              | <b>p</b>                | <b>a</b>                | <b>s</b>                | <b>none</b>             |
|-------|-------------------------|-------------------------|-------------------------|-------------------------|-------------------------|-------------------------|-------------------------|-------------------------|-------------------------|-------------------------|-------------------------|-------------------------|
| V1    | 0.384<br>[0.333, 0.441] | 0.181<br>[0.179, 0.183] | 0.178<br>[0.176, 0.180] | 0.178<br>[0.176, 0.180] | 0.209<br>[0.207, 0.211] | 0.179<br>[0.177, 0.180] | 0.210<br>[0.209, 0.211] | 0.173<br>[0.171, 0.175] | 0.173<br>[0.171, 0.175] | 0.209<br>[0.208, 0.210] | 0.209<br>[0.207, 0.211] | 0.205<br>[0.204, 0.206] |
| V2    | 0.224<br>[0.183, 0.264] | 0.178<br>[0.176, 0.180] | 0.180<br>[0.178, 0.182] | 0.176<br>[0.175, 0.177] | 0.200<br>[0.199, 0.201] | 0.179<br>[0.178, 0.180] | 0.200<br>[0.199, 0.201] | 0.178<br>[0.177, 0.179] | 0.176<br>[0.174, 0.177] | 0.202<br>[0.201, 0.203] | 0.198<br>[0.197, 0.199] | 0.195<br>[0.194, 0.196] |
| V3    | 0.258<br>[0.219, 0.294] | 0.206<br>[0.205, 0.207] | 0.206<br>[0.205, 0.207] | 0.209<br>[0.208, 0.210] | 0.247<br>[0.246, 0.248] | 0.204<br>[0.203, 0.205] | 0.244<br>[0.243, 0.245] | 0.205<br>[0.204, 0.206] | 0.205<br>[0.204, 0.206] | 0.240<br>[0.240, 0.240] | 0.250<br>[0.249, 0.251] | 0.244<br>[0.244, 0.244] |
| V4    | 0.774<br>[0.637, 0.911] | 0.442<br>[0.436, 0.448] | 0.440<br>[0.435, 0.445] | 0.434<br>[0.428, 0.439] | 0.433<br>[0.429, 0.437] | 0.432<br>[0.429, 0.436] | 0.426<br>[0.422, 0.430] | 0.429<br>[0.425, 0.434] | 0.423<br>[0.419, 0.427] | 0.420<br>[0.417, 0.423] | 0.426<br>[0.422, 0.430] | 0.416<br>[0.413, 0.419] |
| V3A/B | 0.586<br>[0.499, 0.681] | 0.378<br>[0.375, 0.381] | 0.398<br>[0.394, 0.402] | 0.368<br>[0.364, 0.373] | 0.388<br>[0.385, 0.391] | 0.392<br>[0.388, 0.396] | 0.392<br>[0.389, 0.395] | 0.366<br>[0.363, 0.369] | 0.381<br>[0.377, 0.384] | 0.374<br>[0.372, 0.376] | 0.389<br>[0.386, 0.392] | 0.369<br>[0.367, 0.371] |
| IPSO  | 1.166<br>[0.915, 1.423] | 0.473<br>[0.464, 0.482] | 0.475<br>[0.462, 0.488] | 0.474<br>[0.465, 0.483] | 0.503<br>[0.497, 0.509] | 0.493<br>[0.481, 0.506] | 0.499<br>[0.493, 0.504] | 0.482<br>[0.473, 0.493] | 0.471<br>[0.464, 0.479] | 0.487<br>[0.481, 0.494] | 0.475<br>[0.470, 0.480] | 0.457<br>[0.452, 0.462] |

<sup>a</sup> To generate CIs, the resampling of the real data is performed at the level of the fits to the reconstructions, whereas resampling layered IEM RMSEs is described in **Materials and Methods**
